# Supplementary material for: Solid state luminescence of phosphine-EWO ligands with fluorinated chalcone skeletons and their PdX2 complexes: metal-promoted phosphorescence enhancement
Source: Royal Society of Chemistry journal article supplement (doi:10.1039/d3dt00408b), 2023-01-01
Supplement: d3dt00408b1.pdf [file d3dt00408b1.pdf]

# Luminescence in the Solid State of Phosphine-EWO Ligands with Fluorinated Chalcone Skeletons and their PdX<sub>2</sub> complexes. Metal-promoted Phosphorescence Enhancement

Jaime Ponce-de-León,<sup>a</sup> Marconi N. Peñas-Defrutos,<sup>a,\*</sup> Andrea Vélez,<sup>a</sup> Gabriel Aullón,<sup>b</sup> and Pablo Espinet<sup>a,\*</sup>

<sup>a</sup> IU CINQUIMA/Química Inorgánica, Facultad de Ciencias, Universidad de Valladolid, 47071-Valladolid (Spain)

<sup>b</sup> Departament de Química Inorgànica, Universitat de Barcelona, Martí i Franquès 1-11, E-08028 Barcelona, (Spain).

*\*To whom correspondence should be addressed:*

marconi\_44@hotmail.com, espinet@qi.uva.es

## Table of Content

|                                                                                                                   |    |
|-------------------------------------------------------------------------------------------------------------------|----|
| General Experimental Section .....                                                                                | 1  |
| Synthesis of iPr-PEWO-F <sub>4</sub> (L <sup>3</sup> ).....                                                       | 2  |
| (2-bromo-3,4,5,6-tetrafluorophenyl)diisopropylphosphine.....                                                      | 2  |
| 2-(diisopropylphosphaneyl)-3,4,5,6-tetrafluorobenzaldehyde .....                                                  | 2  |
| iPr-PEWO-F <sub>4</sub> (L <sup>3</sup> ).....                                                                    | 2  |
| Synthesis of Organometallic Complexes .....                                                                       | 3  |
| <i>General procedure for the synthesis of trans-PdCl<sub>2</sub>(L<sup>2-3</sup>)<sub>2</sub> complexes .....</i> | 3  |
| <i>trans</i> -[PdCl <sub>2</sub> (Cy-PEWO-F <sub>4</sub> ) <sub>2</sub> ] ( <b>1L<sup>2</sup></b> ) .....         | 3  |
| <i>trans</i> -[PdCl <sub>2</sub> (iPr-PEWO-F <sub>4</sub> ) <sub>2</sub> ] ( <b>1L<sup>3</sup></b> ).....         | 3  |
| <i>trans</i> -[PdBr <sub>2</sub> (Ph-PEWO-F <sub>4</sub> ) <sub>2</sub> ] ( <b>3L<sup>1</sup></b> ) .....         | 4  |
| <i>trans</i> -[Pd(CN) <sub>2</sub> (Ph-PEWO-F <sub>4</sub> ) <sub>2</sub> ] ( <b>4L<sup>1</sup></b> ).....        | 4  |
| <i>trans</i> -[PtCl <sub>2</sub> (Ph-PEWO-F <sub>4</sub> ) <sub>2</sub> ] ( <b>5L<sup>1</sup></b> ).....          | 5  |
| X-ray Crystallographic Data.....                                                                                  | 6  |
| Photophysical Properties .....                                                                                    | 10 |
| Emission Spectra.....                                                                                             | 11 |
| Luminescence Data .....                                                                                           | 12 |
| Emission Decay Profiles .....                                                                                     | 13 |
| Excitation Spectra .....                                                                                          | 17 |
| DFT Calculations .....                                                                                            | 18 |
| Computational details.....                                                                                        | 18 |
| Absorption spectra .....                                                                                          | 18 |

|                                                                                   |    |
|-----------------------------------------------------------------------------------|----|
| Phosphorescence emission .....                                                    | 27 |
| Fluorescence emission .....                                                       | 30 |
| NMR Spectra .....                                                                 | 32 |
| Fluxionality of <b>1L</b> <sup>2</sup> and <b>1L</b> <sup>3</sup> complexes ..... | 44 |
| References .....                                                                  | 45 |

## General Experimental Section

All the manipulations were performed by standard Schlenk techniques under N<sub>2</sub> atmosphere. Solvents were dried using a solvent purification system SPS PS-MD-5 or distilled from appropriate drying agents,<sup>1</sup> and were sparged with nitrogen gas. Solvents for experiments in an inert atmosphere were stored into flame-dried Schlenk flasks over freshly activated 3 or 4 Å molecular sieves.

Commercially available chemicals were purchased from Sigma Aldrich, Alfa Aesar, Fluorochem and Acros Organics and were used without further purification.

Ph-PEWO-F<sub>4</sub> (**L**<sup>1</sup>), PdCl<sub>2</sub>(Ph-PEWO-F<sub>4</sub>) (**2L**<sup>1</sup>) and PdCl<sub>2</sub>(Ph-PEWO-F<sub>4</sub>)<sub>2</sub> (**1L**<sup>1</sup>),<sup>2</sup> Cy-PEWO-F<sub>4</sub> (**L**<sup>2</sup>),<sup>3</sup> Ph-PEWO-H<sub>4</sub> (**L**<sup>4</sup>),<sup>4</sup> and PdCl<sub>2</sub>(Ph-PEWO-H<sub>4</sub>)<sub>2</sub> (**1L**<sup>4</sup>),<sup>5</sup> were prepared by reported methods. Flash chromatography was carried out using silica gel (230-240 mesh). Chemical yields refer to pure isolated substances.

NMR spectra were recorded with Varian 500/54 Premium Shielded instruments. Chemical shifts are reported in ppm referenced to tetramethylsilane (<sup>1</sup>H), CCl<sub>3</sub>F (<sup>19</sup>F), and 85% H<sub>3</sub>PO<sub>4</sub> (<sup>31</sup>P), with positive shifts downfield, at 298 K. Coupling constants (*J*) are given in hertz (Hz). The following abbreviations are used to describe peak patterns when appropriate: s (singlet), d (doublet), t (triplet), m (multiplet) and br (broad).

Elemental analysis were carried out with Elemental Analyser EA Flash 2000 (Thermo Fisher Scientific at the PCT facilities of the University of Burgos (Spain).

Luminescence studies were carried out at the PCT facilities of the University of Burgos (Spain). All measurements were carried out under air. Steady-state fluorescence measurements were carried out by using a FLS980 fluorescence spectrometer with a 450W Xe lamp as a light source and double excitation and emission monochromators. Monochromator at 400 nm was used at the excitation and emission arms. A photomultiplier tube detector cooled by a Peltier system was used for detection. To measure the emission lifetimes and photoluminescence quantum yield (QY) the FLS980 fluorescence spectrometer is equipped with an integrating sphere. All data were measured at 25 °C. Time-resolved fluorescence measurements were carried out using the single-photon counting technique with ns time resolution. A high repetition pulsed light source is used to excite the sample and the photons emitted are processed using the TCC1 card in the computer. Fluorescence decays were obtained with the Time Correlated Single Photon Counting (TCSPC) and MCP-PMT counter module (TCC2) of the FLS980 spectrometer (Edinburgh Instruments). Fluorescence decays were analysed with the method of non-linear least squares iterative deconvolution and the quality of the fits was judged by the values of the reduced Chi-square ( $\chi^2$ ) and the autocorrelation function of the residuals using the FAST (Advanced Fluorescence Lifetime Analysis Software) programme provided by the equipment.

## Synthesis of iPr-PEWO-F<sub>4</sub> (L<sup>3</sup>)

iPr-PEWO-F<sub>4</sub> (L<sup>3</sup>) was synthesised following a literature procedure for the general synthesis of R-PEWO-F<sub>4</sub> ligands (Scheme S1),<sup>3</sup> employing iPr<sub>2</sub>PCl. L<sup>3</sup> was obtained in a 58.0 % global yield.

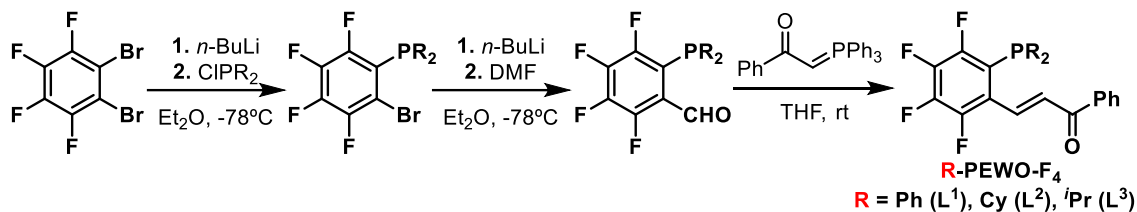

### Scheme S1. General synthesis for R-PEWO-F<sub>4</sub> (L<sup>1</sup>-L<sup>3</sup>)

#### (2-bromo-3,4,5,6-tetrafluorophenyl)diisopropylphosphine

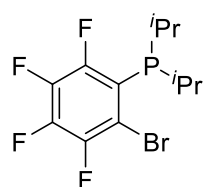

Product was isolated as a colourless solid (90.0 % yield).

**Elemental analysis.** C<sub>12</sub>H<sub>14</sub>BrF<sub>4</sub>P. Calculated %: C, 41.76; H, 4.09. Experimental %: C, 41.78; H, 4.11.

<sup>1</sup>H NMR (499.72 MHz, Chloroform-*d*) δ 2.51 (dttt, *J* = 12.5, 7.0, 3.7, 1.9 Hz, 2H), 1.19 (dd, *J* = 17.2, 6.9 Hz, 6H), 0.96 (ddd, *J* = 12.5, 7.0, 1.2 Hz, 6H).

<sup>19</sup>F NMR (470.17 MHz, Chloroform-*d*) δ -124.60 – -124.80 (m), -124.91 (dtd, *J* = 21.3, 10.1, 3.4 Hz), -150.47 (td, *J* = 20.8, 5.5 Hz), -154.95 (ddt, *J* = 23.3, 19.6, 3.4 Hz).

<sup>31</sup>P{<sup>1</sup>H} NMR (202.30 MHz, Chloroform-*d*) δ 25.0 (dd, *J* = 8.6, 8.0 Hz).

#### 2-(diisopropylphosphaneyl)-3,4,5,6-tetrafluorobenzaldehyde

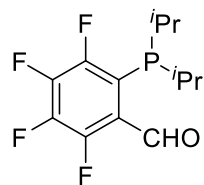

Formation of aldehyde was confirmed by <sup>1</sup>H NMR. Product was used in the next step without further purification.

<sup>1</sup>H NMR (499.72 MHz, Chloroform-*d*) δ 10.51 (dd, *J* = 6.9, 2.0 Hz, 1H).

<sup>19</sup>F NMR (470.17 MHz, Chloroform-*d*) δ -119.35 – -123.16 (m), -141.75 – -144.86 (m), -143.68 – -146.15 (m), -150.44 (td, *J* = 19.9, 7.3 Hz).

<sup>31</sup>P{<sup>1</sup>H} NMR (202.30 MHz, Chloroform-*d*) δ 0.8 (dt, *J* = 18.2, 2.7 Hz).

#### iPr-PEWO-F<sub>4</sub> (L<sup>3</sup>)

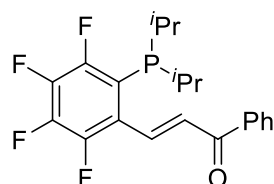

**Elemental analysis.** C<sub>21</sub>H<sub>21</sub>F<sub>4</sub>OP. Calculated %: C, 63.64; H, 5.34. Experimental %: C, 63.65; H, 5.34.

<sup>1</sup>H NMR (499.72 MHz, Chloroform-*d*) δ 8.47 (dd, *J* = 16.1, 5.5 Hz, 1H), 8.03 (d, *J* = 7.7 Hz, 2H), 7.68 – 7.46 (m, 4H), 2.57 – 2.44 (m, 2H), 1.14 (dd, *J* = 17.5, 6.9 Hz, 6H), 0.92 (dd, *J* = 12.4, 7.0 Hz, 6H).

<sup>19</sup>F NMR (470.17 MHz, Chloroform-*d*) δ -125.28 – -125.54 (m), -136.37 – -136.55 (m), -152.49 (td, *J* = 20.1, 5.8 Hz), -152.75 (ddt, *J* = 24.0, 19.9, 3.9 Hz).

<sup>31</sup>P{<sup>1</sup>H} NMR (202.30 MHz, Chloroform-*d*) δ 7.1 (dt, *J* = 20.0, 3.7 Hz).

## Synthesis of Organometallic Complexes

### General procedure for the synthesis of *trans*-PdCl<sub>2</sub>(L<sup>2-3</sup>)<sub>2</sub> complexes

In a flame-dried Schlenk flask, the corresponding ligand L<sup>2</sup> or L<sup>3</sup> (0.79 mmol, 2.05 eq) was added to an orange suspension of *trans*-[PdCl<sub>2</sub>(CH<sub>3</sub>CN)<sub>2</sub>] (100.0 mg, 0.38 mmol) in CH<sub>2</sub>Cl<sub>2</sub> (10 mL), and after a few minutes the resulting mixture turned to a yellowish solution. After stirring for 30 min at room temperature, the solution was filtered through Celite and evaporated to dryness. *n*-hexane was added to afford a yellow solid, which was washed with Et<sub>2</sub>O (2 × 4 mL) and *n*-hexane (2 × 4 mL) and dried in vacuum.

### *trans*-[PdCl<sub>2</sub>(Cy-PEWO-F<sub>4</sub>)<sub>2</sub>] (1L<sup>2</sup>)

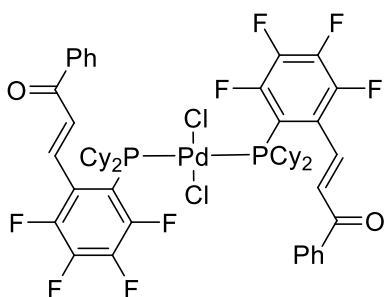

Prepared following general procedure employing Cy-PEWO-F<sub>4</sub> as ligand. Product was obtained as a yellow solid (87.1 % yield).

X-ray-quality crystals were grown by slow diffusion of an acetone/*n*-hexane mixture at -20 °C.

**Elemental analysis.** C<sub>54</sub>H<sub>58</sub>Cl<sub>2</sub>F<sub>8</sub>O<sub>2</sub>P<sub>2</sub>Pd. Calculated %: C, 57.38; H, 5.17. Experimental %: C, 57.41; H, 5.15.

<sup>1</sup>H NMR (499.72 MHz, Chloroform-*d*) δ 8.17 (br, 2H), 8.02 (dd, *J* = 8.3, 1.2 Hz, 4H), 7.61 (tt, *J* = 7.4, 7.3, 1.9 Hz, 2H), 7.57 – 7.42 (m, 6H), 2.84 (t, *J* = 12.1 Hz, 4H), 2.22 (d, *J* = 12.3 Hz, 4H), 1.85 (t, *J* = 15.1 Hz, 8H), 1.64 (ddd, *J* = 71.4, 45.8, 27.4 Hz, 16H), 1.36 (tdd, *J* = 13.0, 9.4, 3.2 Hz, 4H), 1.25 – 1.05 (m, 8H).

<sup>19</sup>F NMR (470.17 MHz, Chloroform-*d*) δ -136.23 (br), -149.81 (td, *J* = 21.2, 8.1 Hz), -152.08 (br).

<sup>31</sup>P{<sup>1</sup>H} NMR (202.30 MHz, Chloroform-*d*) δ 30.5 (s).

### *trans*-[PdCl<sub>2</sub>(iPr-PEWO-F<sub>4</sub>)<sub>2</sub>] (1L<sup>3</sup>)

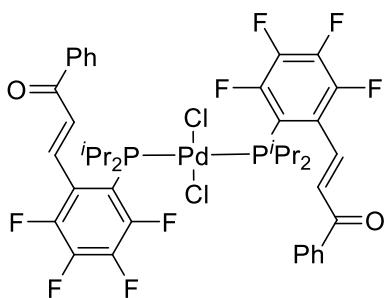

Prepared following general procedure employing iPr-PEWO-F<sub>4</sub> (L<sup>3</sup>) as ligand. Product was obtained as a yellow solid (84.6 % yield).

X-ray-quality crystals were grown by slow diffusion of a CH<sub>2</sub>Cl<sub>2</sub>/*n*-hexane mixture at -20 °C.

**Elemental analysis.** C<sub>39</sub>H<sub>35</sub>Cl<sub>2</sub>F<sub>8</sub>O<sub>2</sub>P<sub>2</sub>Pd. Calculated %: C, 48.90; H, 3.68. Experimental %: C, 48.91; H, 3.67.

<sup>1</sup>H NMR (499.72 MHz, Chloroform-*d*) δ 8.34 (br, 1H), 8.01 (d, *J* = 7.3 Hz, 2H), 7.64 – 7.54 (m, 1H), 7.50 (t, *J* = 7.8 Hz, 2H), 3.07 (p, *J* = 7.2 Hz, 2H), 1.41 (q, *J* = 8.7 Hz, 6H), 1.26 (q, *J* = 7.6 Hz, 6H).

<sup>19</sup>F NMR (470.17 MHz, Chloroform-*d*) δ -134.82 (br), -149.42 (dt, *J* = 23.5, 11.9 Hz), -152.12 (t, *J* = 21.8 Hz).

<sup>31</sup>P{<sup>1</sup>H} NMR (202.30 MHz, Chloroform-*d*) δ 42.0 (s).

### *trans*-[PdBr<sub>2</sub>(Ph-PEWO-F<sub>4</sub>)<sub>2</sub>] (**3L**<sup>1</sup>)

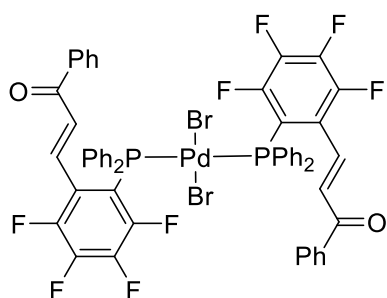

In a round bottom flask, *trans*-[PdCl<sub>2</sub>(Ph-PEWO-F<sub>4</sub>)<sub>2</sub>] (**1L**<sup>1</sup>) (50.7 mg, 45.8 μmol) and KBr (57.4 mg, 482 μmol) were dissolved in 8 mL of acetone. The solution was stirred at room temperature for 1 hour and taken to dryness under vacuum. The solid obtained was redissolved in CH<sub>2</sub>Cl<sub>2</sub> and filtered through Celite. The filtrate was taken to dryness obtaining the product as a yellow solid. It was washed with Et<sub>2</sub>O (2 x 5 mL) and dried under vacuum. Yellow solid (47.2 mg, 86.3 % yield).

**Elemental analysis.** C<sub>54</sub>H<sub>34</sub>Br<sub>2</sub>F<sub>8</sub>O<sub>2</sub>P<sub>2</sub>Pd. Calculated %: C, 54.27; H, 2.87. Experimental %: C, 54.34; H, 2.90

**<sup>1</sup>H NMR** (499.72 MHz, Chloroform-*d*) δ 8.01 – 7.88 (m, 8H), 7.78 (dt, *J* = 8.3, 1.1 Hz, 4H), 7.68 (d, *J* = 15.7 Hz, 2H), 7.55 (t, *J* = 7.1 Hz, 2H), 7.42 (t, *J* = 7.6 Hz, 4H), 7.38 – 7.30 (m, 12H), 7.09 (d, *J* = 15.3 Hz, 2H).

**<sup>19</sup>F NMR** (470.17 MHz, Chloroform-*d*) δ -120.25 – -120.69 (m), -136.23 – -136.45 (m), -150.03 (td, *J* = 20.7, 7.1 Hz), -152.43 (t, *J* = 21.5 Hz).

**<sup>31</sup>P{<sup>1</sup>H} NMR** (202.30 MHz, Chloroform-*d*) δ 14.9 (s).

### *trans*-[Pd(CN)<sub>2</sub>(Ph-PEWO-F<sub>4</sub>)<sub>2</sub>] (**4L**<sup>1</sup>)

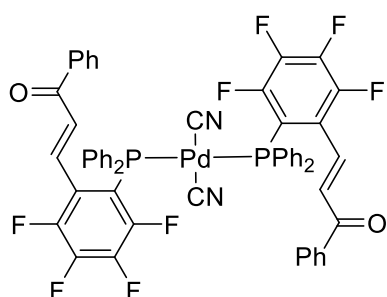

In a round bottom flask, 5 mL of water were added to a mixture of AgNO<sub>3</sub> (35.5 mg, 209 μmol) and KCN (13.7 mg, 210 μmol) in the absence of light. The solution was stirred at room temperature for 2 hours. Then, 5 mL of acetone and *trans*-[PdCl<sub>2</sub>(Ph-PEWO-F<sub>4</sub>)<sub>2</sub>] (**1L**<sup>1</sup>) (110.0 mg, 99.4 μmol) were added and the mixture was stirred for 1 hour. The solution was concentrated under vacuum and extracted with CH<sub>2</sub>Cl<sub>2</sub> (3 x 5 mL). The

organic phase was filtered through Celite and taken to dryness. The solid obtained was washed with Et<sub>2</sub>O and dry under vacuum. The title product was obtained as an off-white solid (71.8 mg, 66.5 % yield).

X-ray-quality crystals were grown by slow diffusion of a CH<sub>2</sub>Cl<sub>2</sub>/*n*-hexane mixture at -20 °C.

**Elemental analysis.** C<sub>56</sub>H<sub>34</sub>F<sub>8</sub>N<sub>2</sub>O<sub>2</sub>P<sub>2</sub>Pd. Calculated %: C, 61.86; H, 3.15; N, 2.58. Experimental %: C, 61.69; H, 3.17; N, 2.67

**<sup>1</sup>H NMR** (499.72 MHz, Chloroform-*d*) δ 7.87 (qd, *J* = 7.1, 6.5, 1.7 Hz, 8H), 7.73 (dd, *J* = 8.1, 1.4 Hz, 4H), 7.59 – 7.50 (m, 2H), 7.46 – 7.38 (m, 16H), 7.36 (d, *J* = 15.7 Hz, 2H), 7.13 (dd, *J* = 15.7, 1.6 Hz, 2H).

**<sup>19</sup>F NMR** (470.17 MHz, Chloroform-*d*) δ -120.36 (dp, *J* = 18.7, 9.4 Hz), -135.08 – -135.26 (m), -147.73 (td, *J* = 20.8, 8.1 Hz), -151.35 (t, *J* = 20.1 Hz).

$^{31}\text{P}\{^1\text{H}\}$  NMR (202.30 MHz, Chloroform-*d*)  $\delta$  15.4 (s).

***trans*-[PtCl<sub>2</sub>(Ph-PEWO-F<sub>4</sub>)<sub>2</sub>] (5L<sup>1</sup>)**

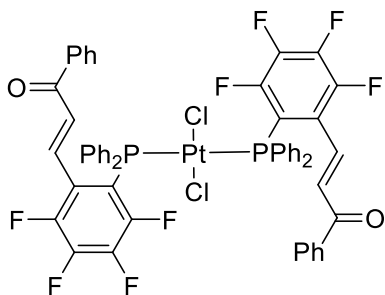

In a flame-dried Schlenk flask, *trans*-[PtCl<sub>2</sub>(CH<sub>3</sub>CN)<sub>2</sub>] (100.0 mg, 0.38 mmol) and Ph-PEWO-F<sub>4</sub> (0.79 mmol, 2.05 eq) were dissolved in 10 mL of CH<sub>2</sub>Cl<sub>2</sub> at room temperature. The solution was stirred for 1 hour, *n*-hexane (10 mL) was added to induce precipitation of the product and the solvent was removed under vacuum. The yellow solid obtained was sonicated with Et<sub>2</sub>O, filtered under air and washed with Et<sub>2</sub>O (2 x 5 mL).

It was dried under vacuum affording the title compound as an off-white solid.

X-ray-quality crystals were grown by slow diffusion of a CH<sub>2</sub>Cl<sub>2</sub>/*n*-hexane mixture at -20 °C.

**Elemental analysis.** C<sub>54</sub>H<sub>34</sub>Cl<sub>2</sub>F<sub>8</sub>O<sub>2</sub>P<sub>2</sub>Pt. Calculated %: C, 54.29; H, 2.87. Experimental %: C, 54.44; H, 2.81

$^1\text{H}$  NMR (499.72 MHz, Chloroform-*d*)  $\delta$  8.15 – 8.03 (m, 8H), 7.82 (d, *J* = 15.8 Hz, 2H), 7.79 – 7.70 (m, 4H), 7.57 – 7.50 (m, 2H), 7.44 – 7.32 (m, 16H), 6.99 (dd, *J* = 15.8, 1.9 Hz, 2H).

$^{19}\text{F}$  NMR (470.17 MHz, Chloroform-*d*)  $\delta$  -122.59 – -123.20 (m), -136.78 (dd, *J* = 24.1, 11.3 Hz), -149.94 (td, *J* = 20.8, 7.1 Hz), -152.70 (t, *J* = 19.1 Hz).

$^{31}\text{P}\{^1\text{H}\}$  NMR (202.30 MHz, Chloroform-*d*)  $\delta$  14.7 (d, *J*<sub>Pt-P</sub> = 2734.3 Hz), 14.7 (s).

## X-ray Crystallographic Data

A crystal was attached to a glass fiber and transferred either to an Agilent Supernova diffractometer with an Atlas CCD area detector (Valladolid University facilities). The crystal was kept at 294 K or 210 K during data collection. Data collection was performed with Mo-K $\alpha$  radiation ( $\lambda = 0.71073 \text{ \AA}$ ). Data integration, scaling and empirical absorption correction were carried out using the CrysAlisPro program package.<sup>6</sup> Using Olex2,<sup>7</sup> the structure was solved with the ShelxT structure solution program,<sup>8</sup> and refined with ShelxL program.<sup>9</sup> The non-hydrogen atoms were refined anisotropically and hydrogen atoms were placed at idealized positions and refined using the riding model. Refinement proceeded smoothly to give the residuals shown in Table S1 and Table S2. CCDC 2205013-2205017 contains the supporting crystallographic data for this paper. These data can be obtained free of charge at [www.ccdc.cam.ac.uk/conts/retrieving.html](http://www.ccdc.cam.ac.uk/conts/retrieving.html) [or from the Cambridge Crystallographic Data Centre, 12, Union Road, Cambridge CB2 1EZ, UK; fax: (internat.) +44-1223/336-033; E-mail: [deposit@ccdc.cam.ac.uk](mailto:deposit@ccdc.cam.ac.uk)]. Figure 3, Figure S1 and Figure S2 show the molecular structures obtained.

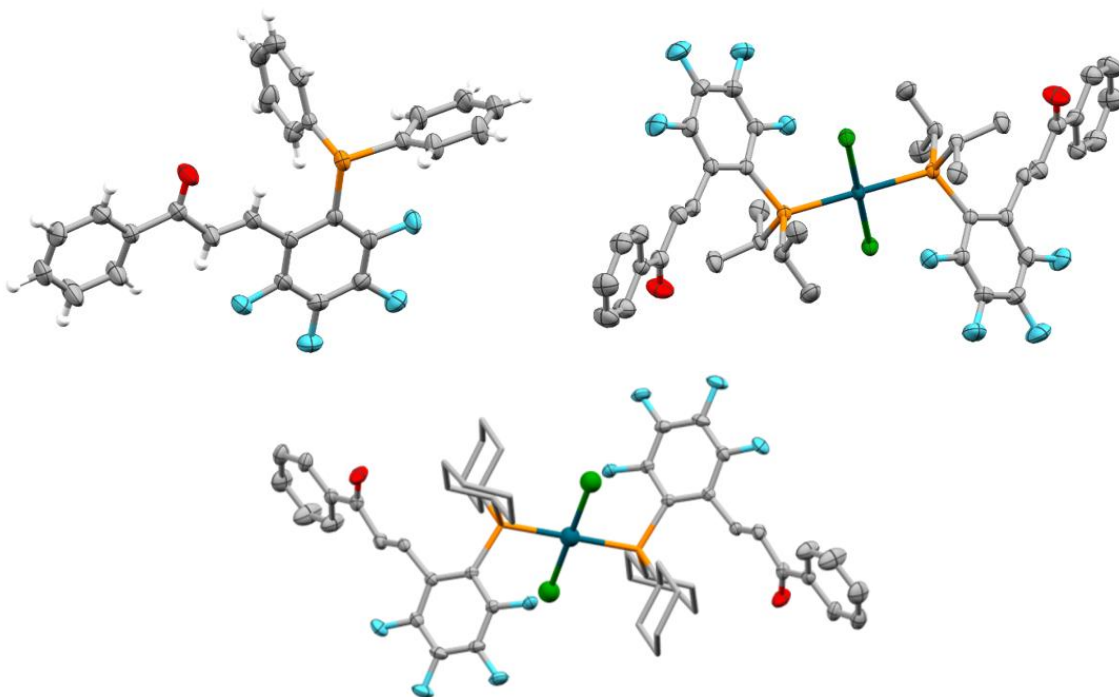

**Figure S1.** X-ray structures of **L**<sup>1</sup> (top, left) and **1L**<sup>3</sup> (top, right) and **1L**<sup>2</sup> (bottom). H atoms and solvent molecule of **1L**<sup>3</sup> and **1L**<sup>2</sup> omitted for clarity.



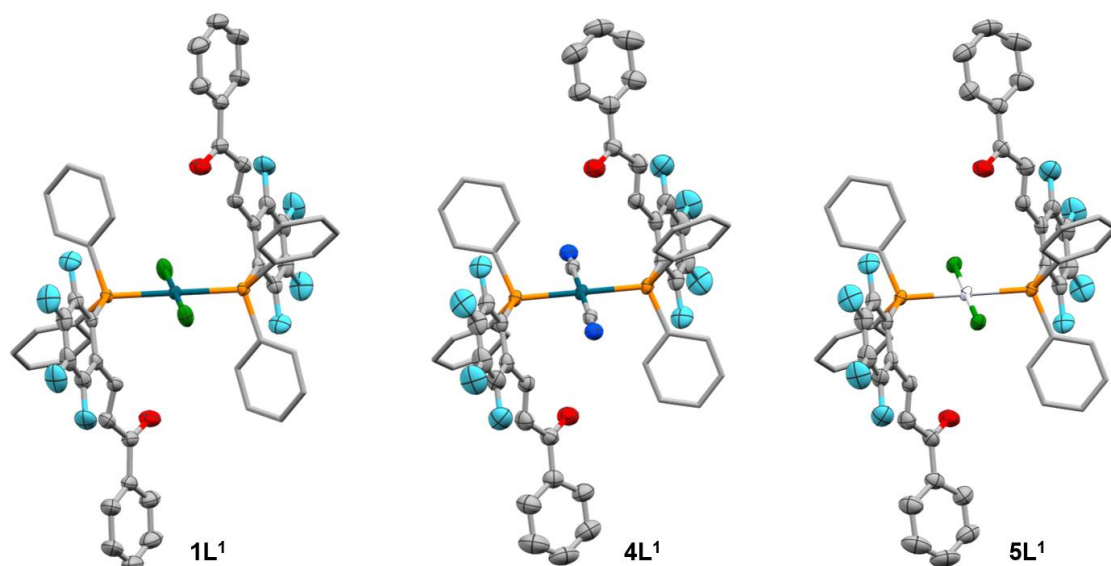

**Figure S2.** X-ray structures of **1L<sup>1</sup>**, **4L<sup>1</sup>** and **5L<sup>1</sup>**. H atoms omitted for clarity. Relevant distances in Å: **1L<sup>1</sup>**: Pd-Cl = 2.2903(7), Pd-P = 2.3231(7), C=C(olefin) = 1.314(4). **4L<sup>1</sup>**: Pd-C = 1.990(4), Pd-P = 2.3388(10), C=C(olefin) = 1.320(6). **5L<sup>1</sup>**: Pt-Cl = 2.3029(11), Pt-P = 2.3241(11), C=C(olefin) = 1.303(7).

**Table S1.** Crystal data and structure refinements for compounds **L<sup>1</sup>**, **1L<sup>2</sup>** and **1L<sup>3</sup>**.

| Identification code                         | <b>L<sup>1</sup></b>                                          | <b>[1L<sup>2</sup>]</b> ·2 acetone                                                              | <b>[1L<sup>3</sup>]</b> · <i>n</i> -hexane                                                      |
|---------------------------------------------|---------------------------------------------------------------|-------------------------------------------------------------------------------------------------|-------------------------------------------------------------------------------------------------|
| CCDC deposition N°                          | 2205016                                                       | 2205014                                                                                         | 2205013                                                                                         |
| Empirical formula                           | C <sub>27</sub> H <sub>17</sub> O <sub>F</sub> <sub>4</sub> P | C <sub>60</sub> H <sub>70</sub> Cl <sub>2</sub> F <sub>8</sub> O <sub>4</sub> P <sub>2</sub> Pd | C <sub>48</sub> H <sub>56</sub> Cl <sub>2</sub> F <sub>8</sub> O <sub>2</sub> P <sub>2</sub> Pd |
| Formula weight                              | 464.38                                                        | 1246.4                                                                                          | 1056.16                                                                                         |
| Temperature/K                               | 294.0                                                         | 209.9(6)                                                                                        | 294.0                                                                                           |
| Crystal system                              | monoclinic                                                    | triclinic                                                                                       | triclinic                                                                                       |
| Space group                                 | P2 <sub>1</sub> /n                                            | P-1                                                                                             | P-1                                                                                             |
| a/Å                                         | 12.2385(6)                                                    | 9.9875(4)                                                                                       | 9.5648(5)                                                                                       |
| b/Å                                         | 5.6909(4)                                                     | 10.2176(3)                                                                                      | 11.8739(7)                                                                                      |
| c/Å                                         | 32.1400(16)                                                   | 15.2240(8)                                                                                      | 11.8921(8)                                                                                      |
| α/°                                         | 90                                                            | 74.659(4)                                                                                       | 74.065(5)                                                                                       |
| β/°                                         | 97.755(5)                                                     | 89.730(4)                                                                                       | 70.863(5)                                                                                       |
| γ/°                                         | 90                                                            | 88.099(3)                                                                                       | 78.505(5)                                                                                       |
| Volume/Å <sup>3</sup>                       | 2218.0(2)                                                     | 1497.39(11)                                                                                     | 1218.03(14)                                                                                     |
| Z                                           | 4                                                             | 1                                                                                               | 1                                                                                               |
| ρ <sub>calc</sub> /cm <sup>3</sup>          | 1.391                                                         | 1.382                                                                                           | 1.44                                                                                            |
| μ/mm <sup>-1</sup>                          | 0.175                                                         | 0.522                                                                                           | 0.624                                                                                           |
| F(000)                                      | 952                                                           | 644                                                                                             | 542                                                                                             |
| Crystal size/mm <sup>3</sup>                | 0.527 × 0.098 × 0.049                                         | 0.22 × 0.157 × 0.105                                                                            | 0.155 × 0.143 × 0.116                                                                           |
| Radiation                                   | MoKα (λ = 0.71073)                                            | MoKα (λ = 0.71073)                                                                              | MoKα (λ = 0.71073)                                                                              |
| 2θ range for data collection/°              | 6.72 to 49.994                                                | 6.904 to 59.51                                                                                  | 6.898 to 59.258                                                                                 |
| Index ranges                                | -14 ≤ h ≤ 14,<br>-4 ≤ k ≤ 6,<br>-38 ≤ l ≤ 33                  | -13 ≤ h ≤ 10,<br>-14 ≤ k ≤ 13,<br>-19 ≤ l ≤ 20                                                  | -12 ≤ h ≤ 12,<br>-16 ≤ k ≤ 14,<br>-13 ≤ l ≤ 14                                                  |
| Reflections collected                       | 7703                                                          | 10840                                                                                           | 8436                                                                                            |
| Independent reflections                     | 3878 [R <sub>int</sub> = 0.0311, R <sub>sigma</sub> = 0.0503] | 6875 [R <sub>int</sub> = 0.0312, R <sub>sigma</sub> = 0.0682]                                   | 5555 [R <sub>int</sub> = 0.0282, R <sub>sigma</sub> = 0.0605]                                   |
| Data/restraints/parameters                  | 3878/0/298                                                    | 6875/0/351                                                                                      | 5555/2/291                                                                                      |
| Goodness-of-fit on F <sup>2</sup>           | 1.023                                                         | 1.034                                                                                           | 1.082                                                                                           |
| Final R indexes [I ≥ 2σ (I)]                | R <sub>1</sub> = 0.0529, wR <sub>2</sub> = 0.1042             | R <sub>1</sub> = 0.0491, wR <sub>2</sub> = 0.0923                                               | R <sub>1</sub> = 0.0471, wR <sub>2</sub> = 0.0899                                               |
| Final R indexes [all data]                  | R <sub>1</sub> = 0.0843, wR <sub>2</sub> = 0.1210             | R <sub>1</sub> = 0.0744, wR <sub>2</sub> = 0.1060                                               | R <sub>1</sub> = 0.0705, wR <sub>2</sub> = 0.1087                                               |
| Largest diff. peak/hole / e Å <sup>-3</sup> | 0.28/-0.18                                                    | 0.50/-0.44                                                                                      | 0.44/-0.51                                                                                      |

**Table S2.** Crystal data and structure refinements for compounds **4L<sup>1</sup>** and **5L<sup>1</sup>**.

| Identification code                         | <b>4L<sup>1</sup></b>                                                                          | <b>5L<sup>1</sup></b>                                                                           |
|---------------------------------------------|------------------------------------------------------------------------------------------------|-------------------------------------------------------------------------------------------------|
| CCDC deposition N°                          | 2205015                                                                                        | 2205017                                                                                         |
| Empirical formula                           | C <sub>56</sub> H <sub>34</sub> F <sub>8</sub> N <sub>2</sub> O <sub>2</sub> P <sub>2</sub> Pd | C <sub>54</sub> H <sub>34</sub> Cl <sub>2</sub> F <sub>8</sub> O <sub>2</sub> P <sub>2</sub> Pt |
| Formula weight                              | 1087.19                                                                                        | 1194.74                                                                                         |
| Temperature/K                               | 294.0                                                                                          | 294.0                                                                                           |
| Crystal system                              | monoclinic                                                                                     | monoclinic                                                                                      |
| Space group                                 | P2 <sub>1</sub> /n                                                                             | P2 <sub>1</sub> /n                                                                              |
| a/Å                                         | 14.2828(10)                                                                                    | 13.9677(8)                                                                                      |
| b/Å                                         | 10.9456(9)                                                                                     | 10.9580(5)                                                                                      |
| c/Å                                         | 16.2908(9)                                                                                     | 16.3180(7)                                                                                      |
| α/°                                         | 90                                                                                             | 90                                                                                              |
| β/°                                         | 109.972(7)                                                                                     | 109.719(5)                                                                                      |
| γ/°                                         | 90                                                                                             | 90                                                                                              |
| Volume/Å <sup>3</sup>                       | 2393.6(3)                                                                                      | 2351.1(2)                                                                                       |
| Z                                           | 2                                                                                              | 2                                                                                               |
| ρ <sub>calc</sub> /cm <sup>3</sup>          | 1.508                                                                                          | 1.688                                                                                           |
| μ/mm <sup>-1</sup>                          | 0.532                                                                                          | 3.241                                                                                           |
| F(000)                                      | 1096                                                                                           | 1176                                                                                            |
| Crystal size/mm <sup>3</sup>                | 0.496 × 0.207 × 0.039                                                                          | 0.431 × 0.218 × 0.139                                                                           |
| Radiation                                   | MoKα (λ = 0.71073)                                                                             | MoKα (λ = 0.71073)                                                                              |
| 2θ range for data collection/°              | 6.838 to 59.484                                                                                | 6.942 to 59.06                                                                                  |
| Index ranges                                | -14 ≤ h ≤ 19,<br>-14 ≤ k ≤ 10,<br>-22 ≤ l ≤ 16                                                 | -18 ≤ h ≤ 14,<br>-10 ≤ k ≤ 14,<br>-16 ≤ l ≤ 22                                                  |
| Reflections collected                       | 10247                                                                                          | 9845                                                                                            |
| Independent reflections                     | 5507 [R <sub>int</sub> = 0.0314, R <sub>sigma</sub> = 0.0657]                                  | 5505 [R <sub>int</sub> = 0.0312, R <sub>sigma</sub> = 0.0632]                                   |
| Data/restraints/parameters                  | 5507/0/322                                                                                     | 5505/0/313                                                                                      |
| Goodness-of-fit on F <sup>2</sup>           | 1.036                                                                                          | 1.071                                                                                           |
| Final R indexes [ I  ≥ 2σ (I)]              | R <sub>1</sub> = 0.0517, wR <sub>2</sub> = 0.1034                                              | R <sub>1</sub> = 0.0390, wR <sub>2</sub> = 0.0645                                               |
| Final R indexes [all data]                  | R <sub>1</sub> = 0.1034, wR <sub>2</sub> = 0.1321                                              | R <sub>1</sub> = 0.0751, wR <sub>2</sub> = 0.0789                                               |
| Largest diff. peak/hole / e Å <sup>-3</sup> | 0.81/-0.60                                                                                     | 0.92/-0.61                                                                                      |

## Photophysical Properties

Figure S3 shows example pictures of samples of  $L^1$  and  $1L^1$  upon irradiation with a bench UV lamp (365 nm). Colour change of the solid is clearly observed, with  $1L^1$  showing a red-shifted emission compared to  $L^1$ .

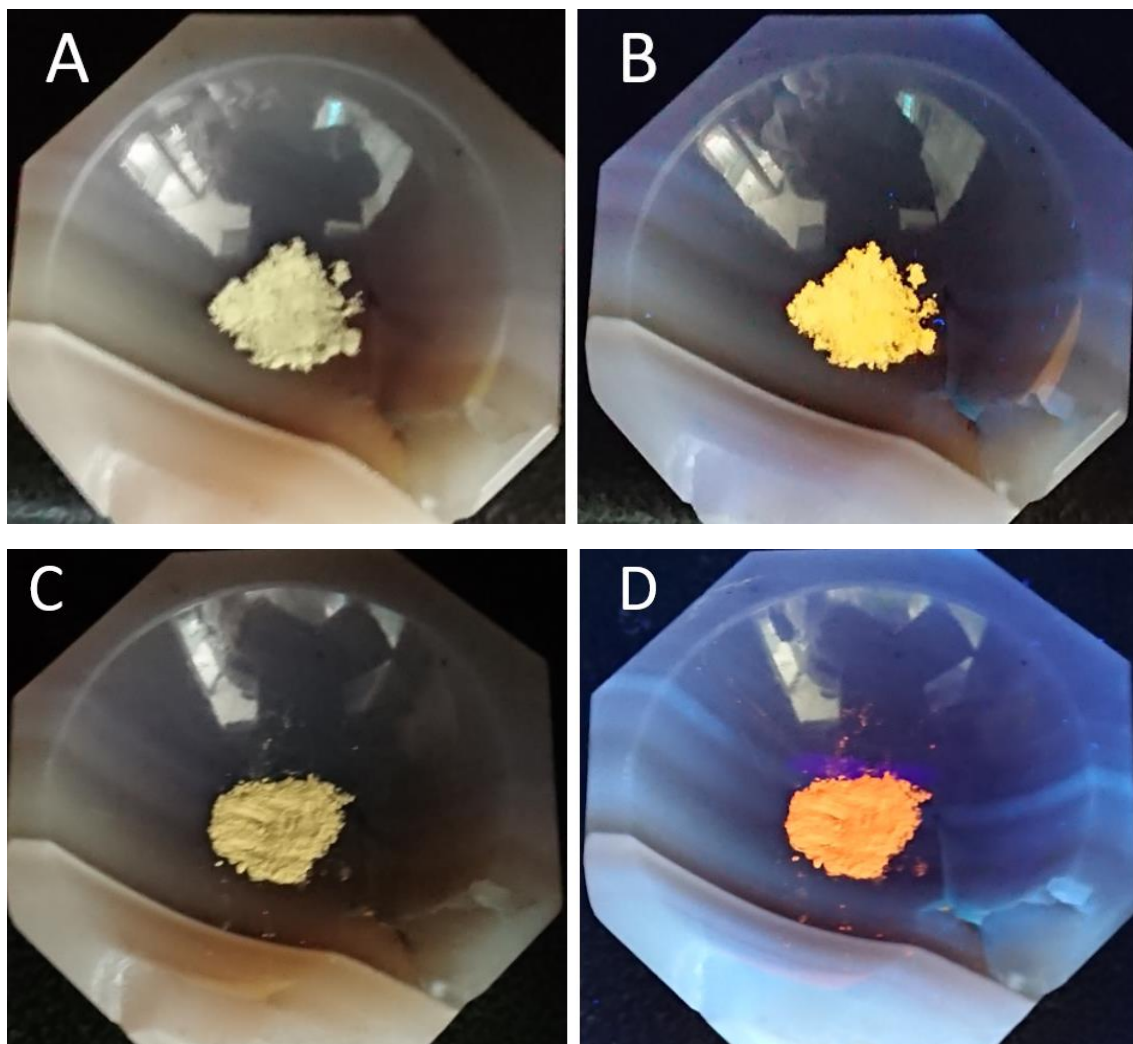

**Figure S3.** Pictures of  $L^1$  (A, B) and  $1L^1$  (C, D) without (*left*) and with (*right*) irradiation.

Figure S4 and Figure S5 show the normalised emission spectra for ligands and complexes respectively. Representative data of the luminescence properties are gathered in Table S3. Figure S6 - Figure S12 show the emission decay profile of the compounds. Figure S14 and Figure S15 show the normalised excitation spectra for ligands and complexes respectively.

## Emission Spectra

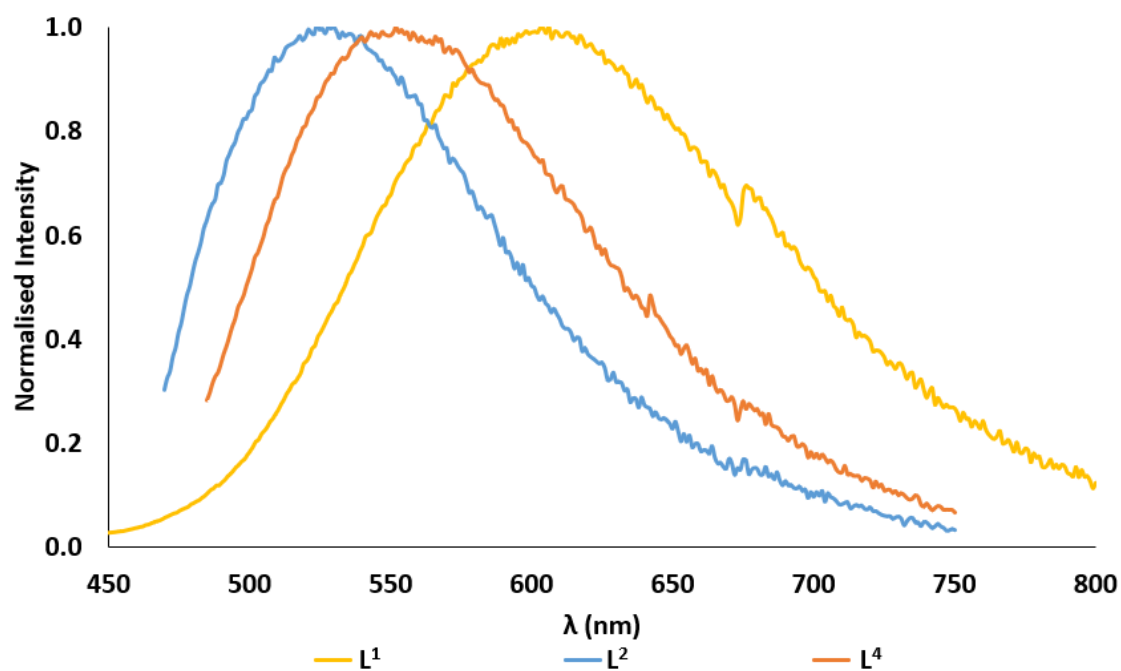

Figure S4. Normalised emission spectra of L<sup>1</sup>, L<sup>2</sup> and L<sup>4</sup>.

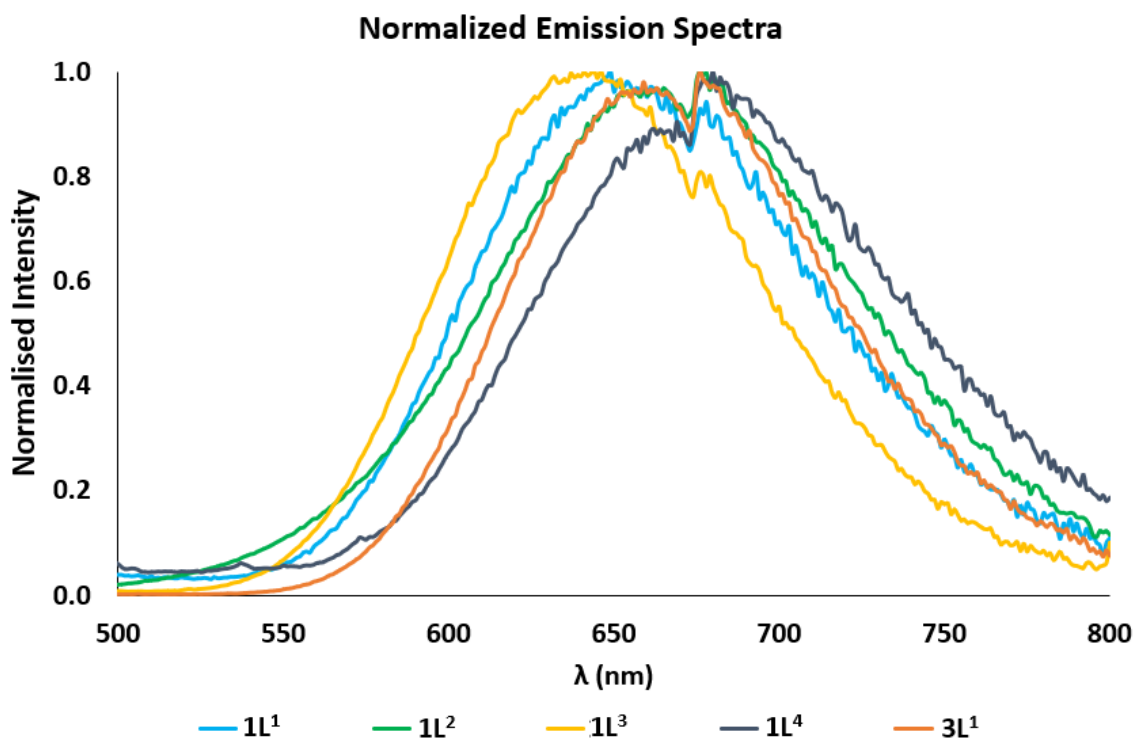

Figure S5. Normalised emission spectra of 1L<sup>1</sup>, 1L<sup>2</sup>, 1L<sup>3</sup>, 1L<sup>4</sup> and 3L<sup>1</sup>.

## Luminescence Data

**Table S3.** Excitation and emission data in the solid state.

| Comp                                                                         | $\lambda_{\text{exc}}/\text{nm}$ | $\lambda_{\text{em}}/\text{nm}$ | $\varphi/\%$ | $\tau_{\text{av}}^{\text{a}}/\text{ns}$ | $\tau_{\text{n}}^{\text{b}}/\text{ns}; A_{\text{n}}^{\text{c}}$ |
|------------------------------------------------------------------------------|----------------------------------|---------------------------------|--------------|-----------------------------------------|-----------------------------------------------------------------|
| Ph-PEWO-F <sub>4</sub> (L <sup>1</sup> )                                     | 413                              | 606                             | 10.1         | 2.47                                    | $\tau_1 = 1.88; A_1 = 0.51$<br>$\tau_2 = 6.18; A_2 = 0.49$      |
| Cy-PEWO-F <sub>4</sub> (L <sup>2</sup> )                                     | 460                              | 530                             | 4.1          | 3.53                                    | $\tau_1 = 2.23; A_1 = 0.51$<br>$\tau_2 = 7.20; A_2 = 0.49$      |
| Ph-PEWO-H <sub>4</sub> (L <sup>4</sup> )                                     | 468                              | 552                             | 2.7          | 3.04                                    | $\tau_1 = 1.82; A_1 = 0.54$<br>$\tau_2 = 6.62; A_2 = 0.46$      |
| PdCl <sub>2</sub> (Ph-PEWO-F <sub>4</sub> ) <sub>2</sub> (1L <sup>1</sup> )  | 405                              | 649                             | 28.0         | 1312.49                                 | $\tau_1 = 152.72; A_1 = 0.06$<br>$\tau_2 = 1405.88; A_2 = 0.94$ |
| PdCl <sub>2</sub> (Cy-PEWO-F <sub>4</sub> ) <sub>2</sub> (1L <sup>2</sup> )  | 412                              | 676                             | 21.8         | 1623.54                                 | $\tau_1 = 6.81; A_1 = 0.19$<br>$\tau_2 = 2005.97; A_2 = 0.81$   |
| PdCl <sub>2</sub> (iPr-PEWO-F <sub>4</sub> ) <sub>2</sub> (1L <sup>3</sup> ) | 405                              | 643                             | 15.6         | 1397.73                                 | $\tau_1 = 0.97; A_1 = 0.04$<br>$\tau_2 = 1455.97; A_2 = 0.96$   |
| PdCl <sub>2</sub> (Ph-PEWO-H <sub>4</sub> ) <sub>2</sub> (1L <sup>4</sup> )  | 469                              | 680                             | 1.8          | 637.39                                  | $\tau_1 = 103.75; A_1 = 0.07$<br>$\tau_2 = 693.24; A_2 = 0.93$  |
| PdBr <sub>2</sub> (Ph-PEWO-F <sub>4</sub> ) <sub>2</sub> (3L <sup>1</sup> )  | 415                              | 666                             | 15.7         | 5115.10                                 | $\tau_1 = 508.88; A_1 = 0.12$<br>$\tau_2 = 5948.2; A_2 = 0.88$  |

<sup>a</sup> Average lifetime:  $\tau_{\text{av}} = (A_1\tau_1^2 + A_2\tau_2^2 + \dots) / (A_1\tau_1 + A_2\tau_2 + \dots)$ . <sup>b</sup> Natural lifetime. <sup>c</sup> Intensity coefficients.

## Emission Decay Profiles

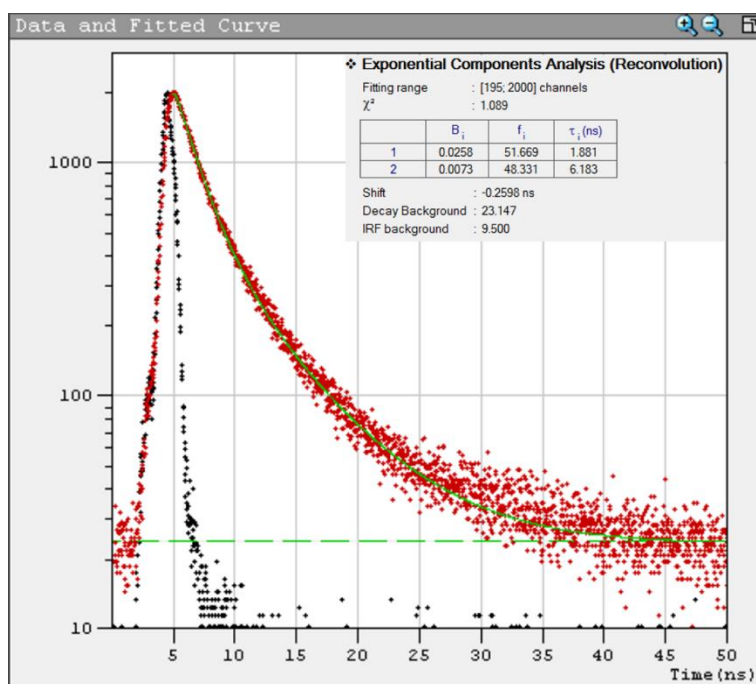

Figure S6. Emission Decay profile of Ph-PEWO-F<sub>4</sub> (L<sup>1</sup>).

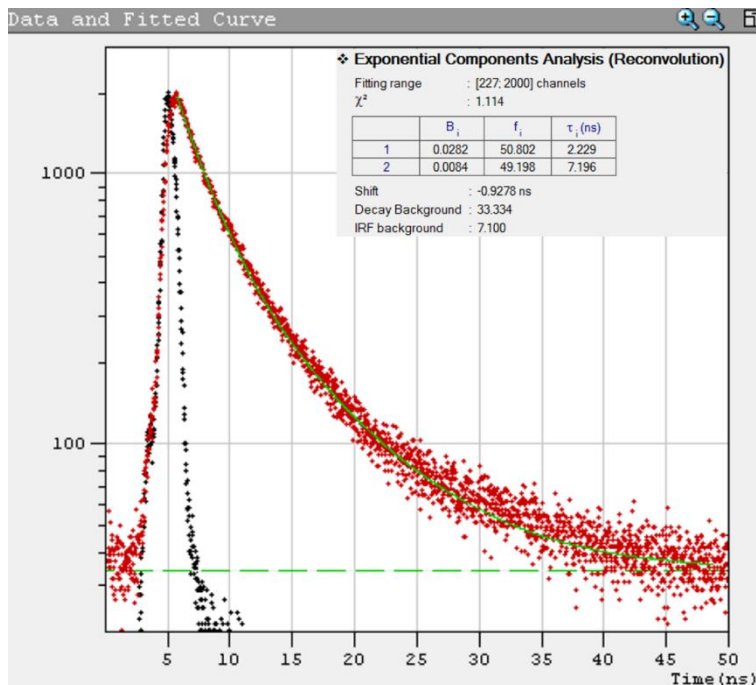

Figure S7. Emission Decay profile of Cy-PEWO-F<sub>4</sub> (L<sup>2</sup>).

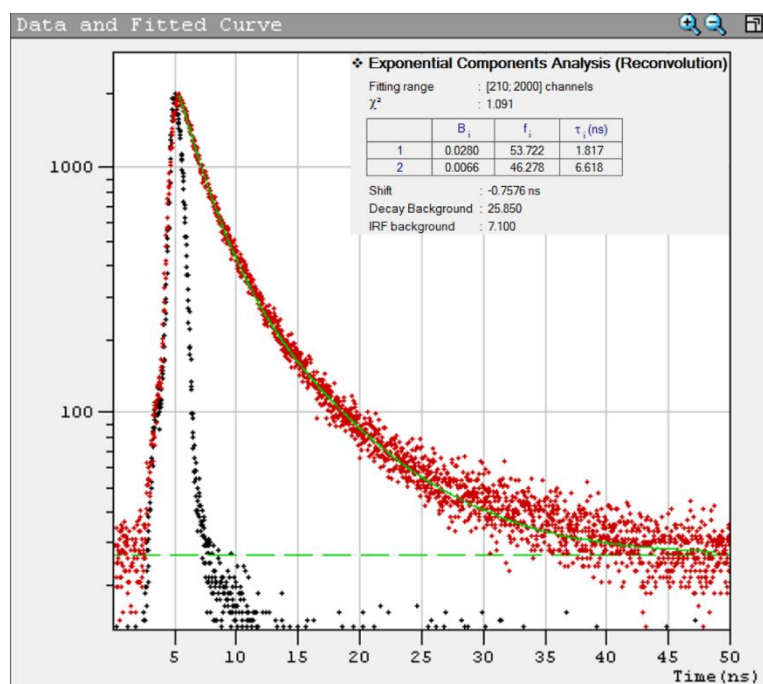

Figure S8. Emission Decay profile of Ph-PEWO-H<sub>4</sub> (**L**<sup>4</sup>).

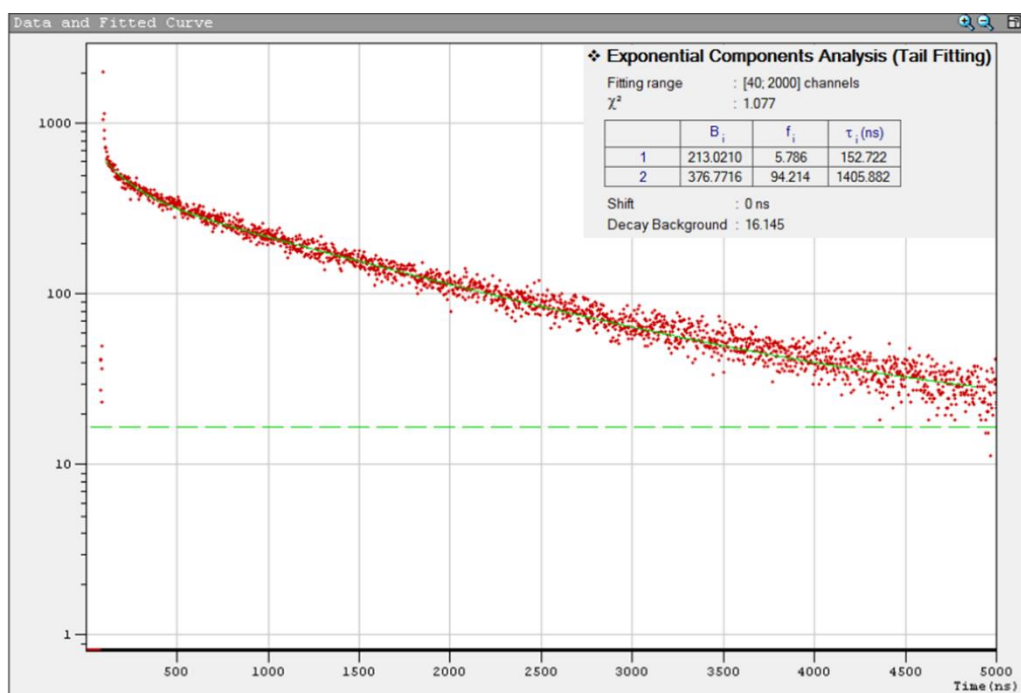

Figure S9. Emission Decay profile of PdCl<sub>2</sub>(Ph-PEWO-F<sub>4</sub>)<sub>2</sub> (**1L**<sup>1</sup>).



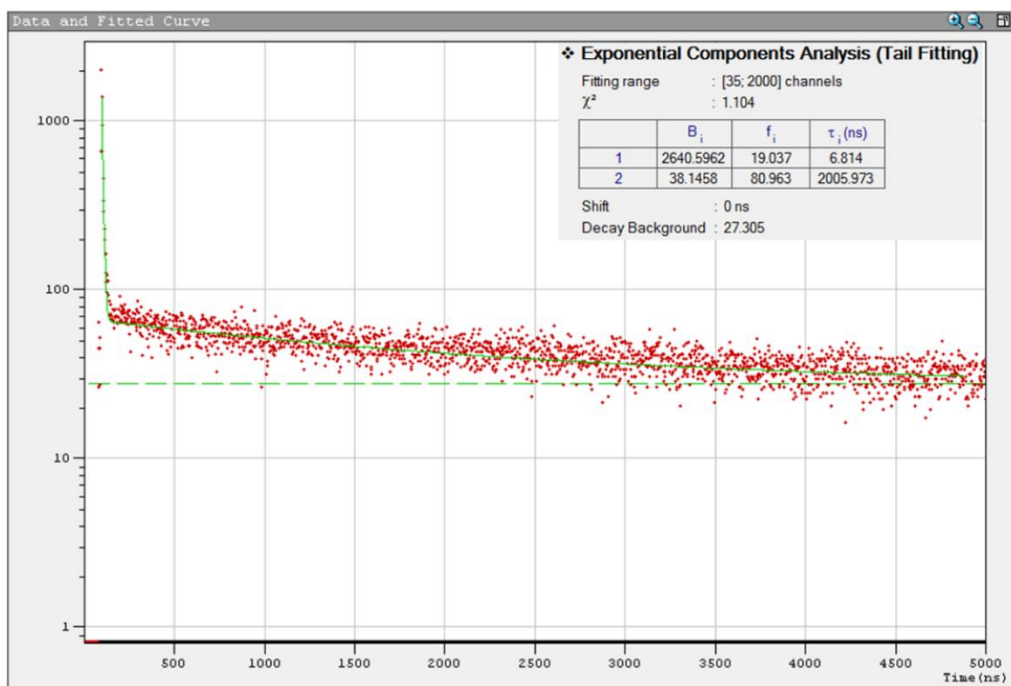

Figure S10. Emission Decay profile of  $\text{PdCl}_2(\text{Cy-PEWO-F}_4)_2$  (**1L<sup>2</sup>**).

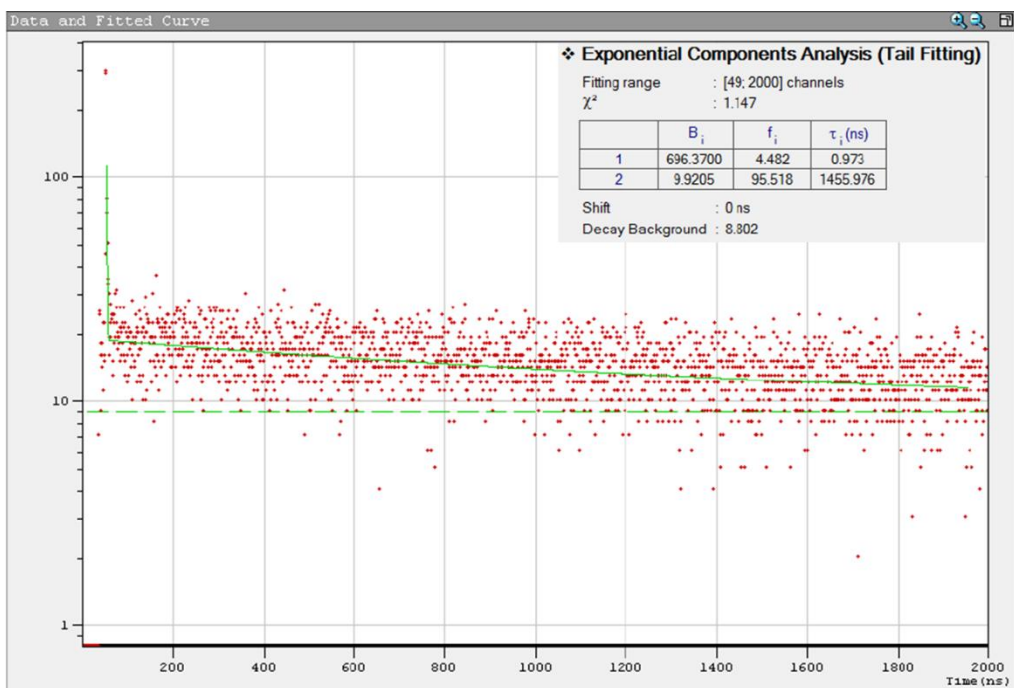

Figure S11. Emission Decay profile of  $\text{PdCl}_2(\text{iPr-PEWO-F}_4)_2$  (**1L<sup>3</sup>**).

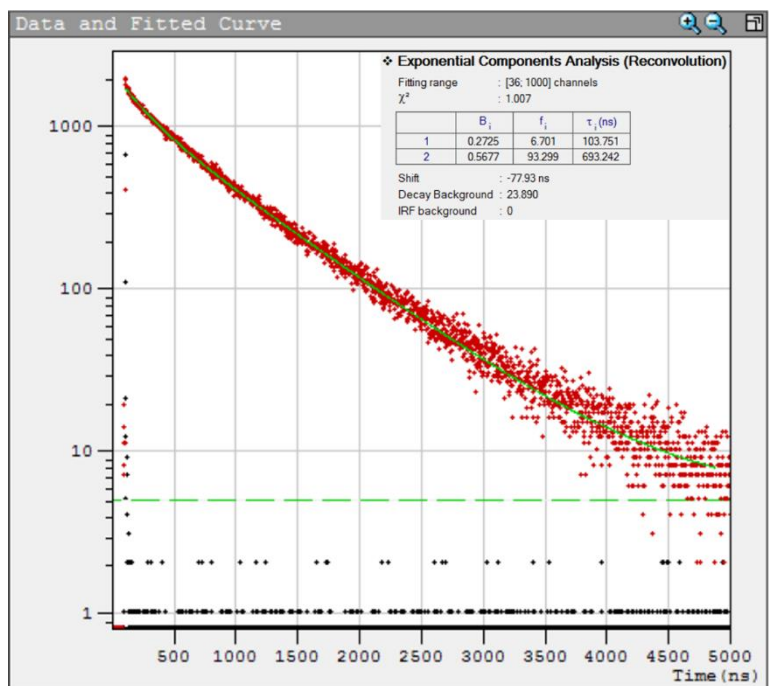

Figure S12. Emission Decay profile of  $\text{PdCl}_2(\text{Ph-PEWO-H}_4)_2$  (**1L<sup>4</sup>**).

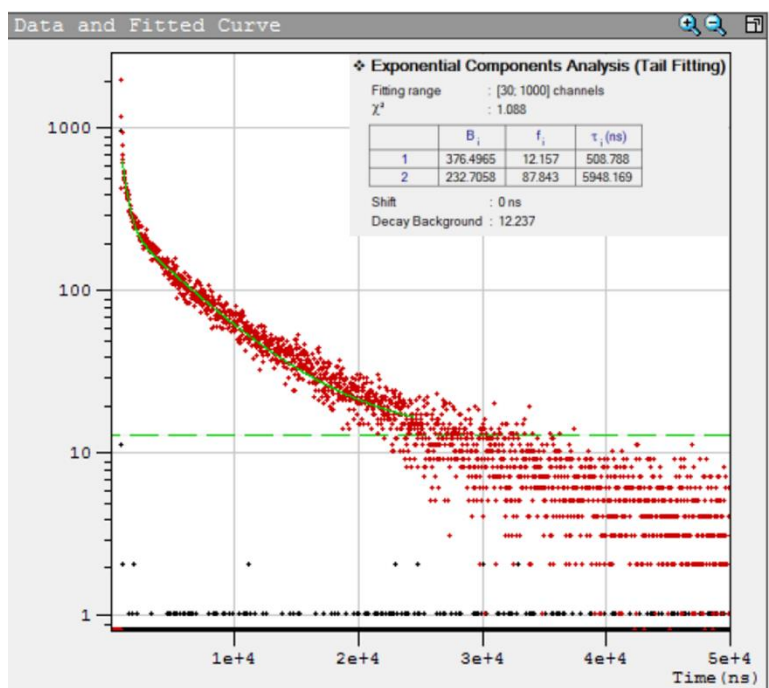

Figure S13. Emission Decay profile of  $\text{PdBr}_2(\text{Ph-PEWO-F}_4)_2$  (**3L<sup>1</sup>**).

## Excitation Spectra

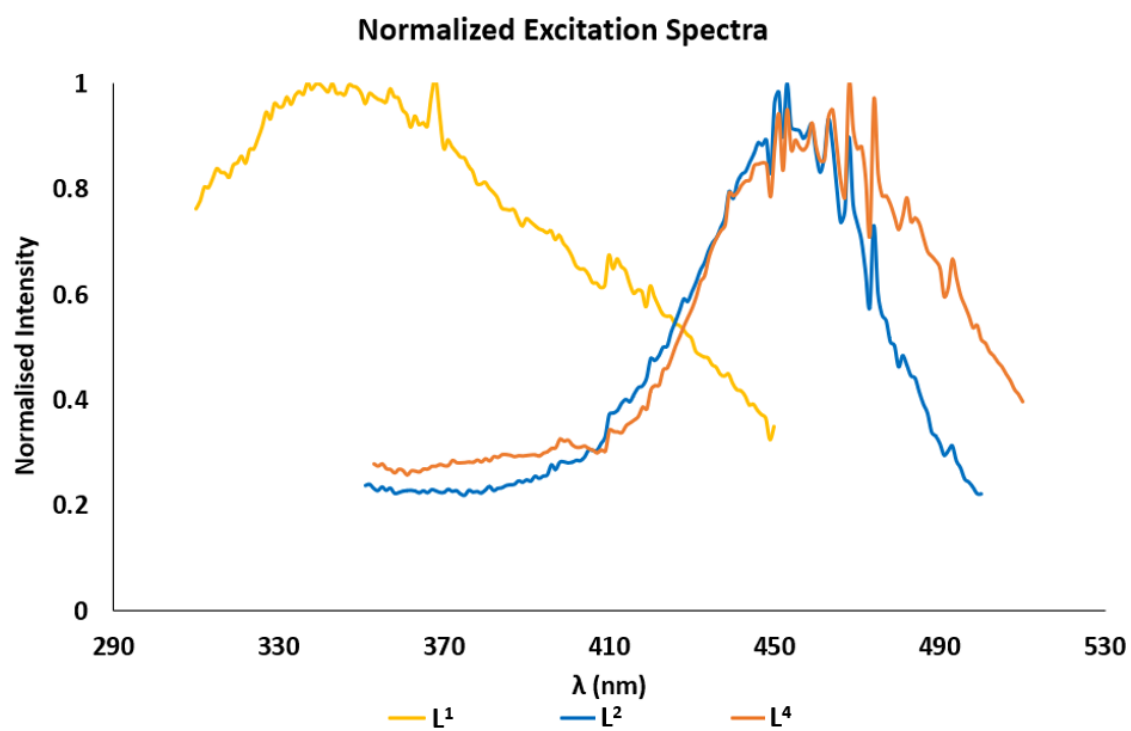

Figure S14. Normalised excitation spectra of L<sup>1</sup>, L<sup>2</sup> and L<sup>4</sup>.

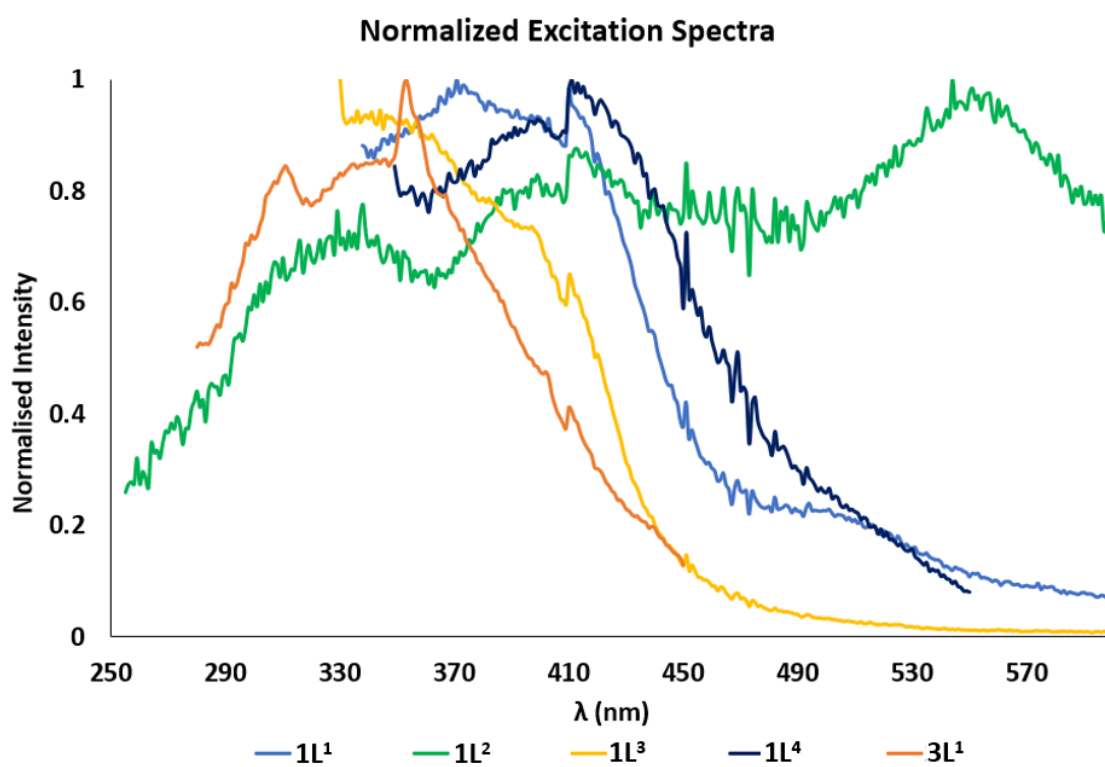

Figure S15. Normalised excitation spectra of 1L<sup>1</sup>, 1L<sup>2</sup>, 1L<sup>3</sup>, 1L<sup>4</sup> and 3L<sup>1</sup>.

## DFT Calculations

### Computational details

Geometry optimizations in the gas phase were carried out using the Gaussian09 package using the x-ray structures as initial guesses when available.<sup>10</sup> The hybrid density function method known as B3LYP was applied.<sup>11</sup> Effective core potentials (ECP) were used to represent the innermost electrons of the transition atoms (Pd and Pt) and the basis set of valence double- $\xi$  quality for associated with the pseudopotentials known as LANL2DZ.<sup>12</sup> The basis set for the main group elements was 6-31G\* (Cl, P, C, N, O, F and H).<sup>13</sup> Excited states and absorption spectra were obtained from the time-dependent algorithm implemented in Gaussian09.<sup>14</sup> Acronyms like MLCT or ILCT (metal-ligand or intra-ligand charge transfer respectively) are used in the Tables of this section to categorize the type of electronic transition.

### Absorption spectra

Calculated absorption parameters (wavelengths in nm and their intensities) for  $L^1$  derivatives in the gas phase (Table S4). For metal complexes  $1L^1$  (Table S5),  $5L^1$  (Table S6) and  $4L^1$  (Table S7) only absorptions with intensities  $f$  factor above 0.10 are shown. For each entry, main contributions of the molecular orbitals for the transition and their coefficients are shown. Moreover, representation of the most relevant molecular orbitals (contour values is fixed to 0.05 e/Å<sup>3</sup>) and its composition is added for each compound. Figure S16 shows the simulated absorption spectra for all the compounds studied.

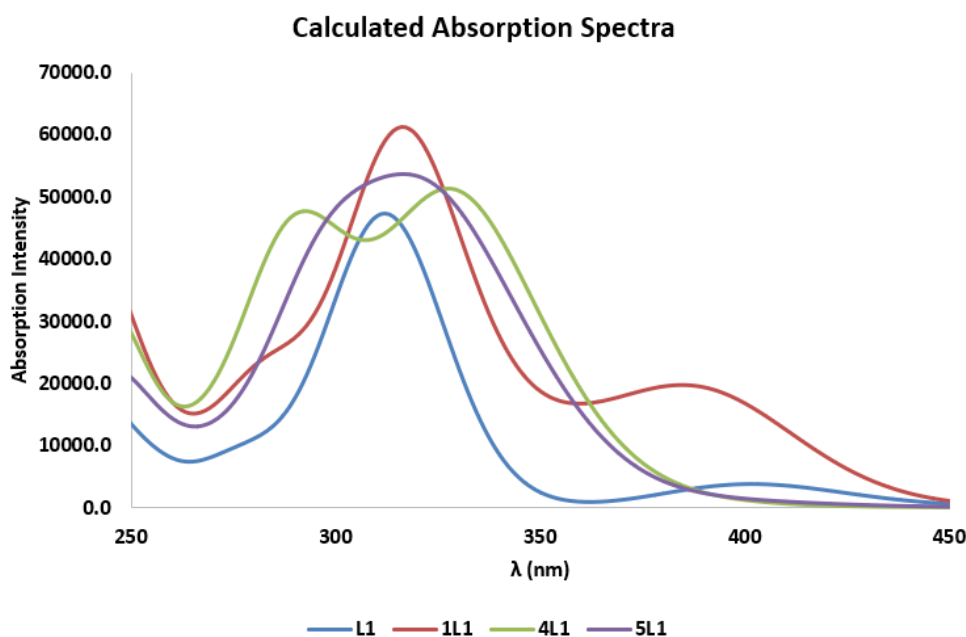

**Figure S16.** Computed absorption spectra for  $L^1$  (blue),  $1L^1$  (red),  $4L^1$  (green),  $5L^1$  (purple).

**Table S4.** Absorption parameters for  $L^1$ . The electronic transition coincident with the excitation maximum is highlighted in bold.

| $\lambda$ (f)     | Assignment                                                                                                                                                                                                                                                            | OM                                                       |
|-------------------|-----------------------------------------------------------------------------------------------------------------------------------------------------------------------------------------------------------------------------------------------------------------------|----------------------------------------------------------|
| <b>402 (0.05)</b> | <b>ILCT (PPh<sub>2</sub> → EWO):</b><br><b><math>\pi(\text{PPh}_2)_{\text{HOMO}} \rightarrow \pi^*(\text{EWO})_{\text{LUMO}}</math> [88%]</b>                                                                                                                         | <b>119 → 120 [0.66]</b>                                  |
| 314 (0.59)        | Chalcone:<br>$\pi(\text{EWO}) \rightarrow \pi^*(\text{EWO})_{\text{LUMO}}$ [80%]                                                                                                                                                                                      | 118 → 120 [0.66]                                         |
| 306 (0.05)        | ILCT (PPh <sub>2</sub> → EWO):<br>$\pi(\text{PPh}_2) \rightarrow \pi^*(\text{EWO})_{\text{LUMO}}$ [73%]<br>$\pi(\text{EWO}, \text{PPh}_2) \rightarrow \pi^*(\text{EWO})_{\text{LUMO}}$ [12%]                                                                          | 116 → 120 [0.60]<br>114 → 120 [0.25]                     |
| 302 (0.05)        | ILCT (PPh <sub>2</sub> → EWO):<br>$\pi(\text{PPh}_2)_{\text{HOMO}} \rightarrow \pi^*(\text{EWO})$ [45%]<br>$\pi(\text{PPh}_2) \rightarrow \pi^*(\text{EWO})_{\text{LUMO}}$ [22%]<br>$\pi(\text{EWO}, \text{PPh}_2) \rightarrow \pi^*(\text{EWO})_{\text{LUMO}}$ [18%] | 119 → 121 [0.47]<br>116 → 120 [0.33]<br>114 → 120 [0.30] |

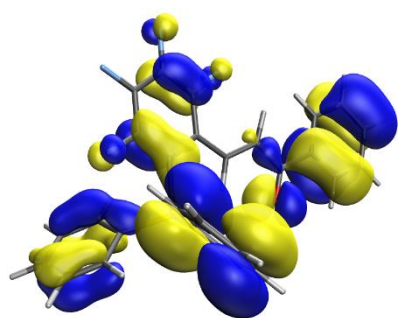

MO 114 (HOMO-3): -0.256 Ha  
EWO (58), PPh<sub>2</sub> (42)

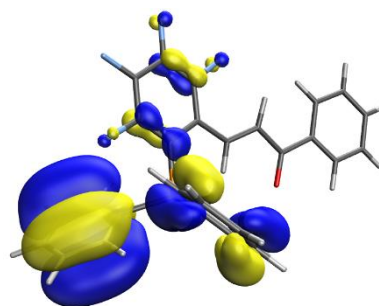

MO 116 (HOMO-2): -0.251 Ha  
PPh<sub>2</sub> (97)

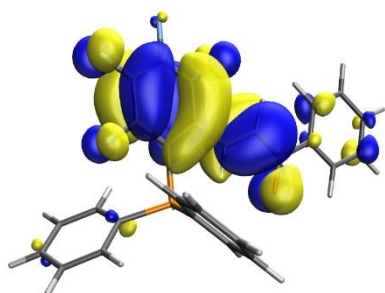

MO 118 (HOMO-1): -0.242 Ha  
EWO (98)

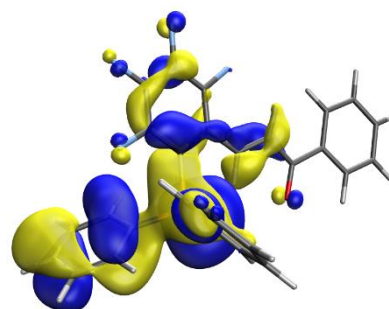

MO 119 (HOMO): -0.221 Ha  
PPh<sub>2</sub> (87), EWO (13)

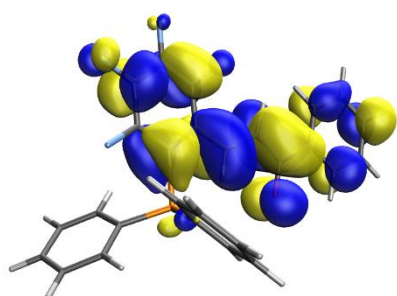

MO 120 (LUMO): -0.085 Ha  
EWO (99)

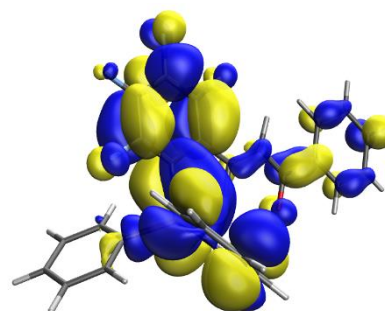

MO 121 (LUMO+1): -0.041 Ha  
EWO (67), PPh<sub>2</sub> (33)

**Figure S17.** Relevant molecular orbitals for L<sup>1</sup>. Energies and fragment contributions are also shown.

**Table S5.** Absorption parameters for **1L<sup>1</sup>**. The electronic transition coincident with the excitation maximum is highlighted in bold.

| $\lambda$ (f)     | Assignment                                                                                                                                                                                                                                                                                                                                                                                                                                                          | OM                                                                                               |
|-------------------|---------------------------------------------------------------------------------------------------------------------------------------------------------------------------------------------------------------------------------------------------------------------------------------------------------------------------------------------------------------------------------------------------------------------------------------------------------------------|--------------------------------------------------------------------------------------------------|
| <b>395 (0.20)</b> | <b>ILCT (PPh<sub>2</sub> → EWO):</b><br><b><math>\pi(\text{PPh}_2) \rightarrow \pi^*(\text{EWO}), d(\text{Pd})_{\text{LUMO}}</math> [77%]</b>                                                                                                                                                                                                                                                                                                                       | <b>262 → 265 [0.62]</b>                                                                          |
| 318 (0.16)        | Chalcone:<br>$\pi(\text{EWO}, \text{PPh}_2), d(\text{Pd}) \rightarrow \pi^*(\text{EWO})$ [25%]<br>$\pi(\text{EWO}), d(\text{Pd}) \rightarrow \pi^*(\text{EWO})$ [25%]<br>$\pi(\text{PPh}_2, \text{EWO}) \rightarrow \pi^*(\text{EWO}), d(\text{Pd})_{\text{LUMO}}$ [10%]<br>$\pi(\text{PPh}_2) \rightarrow \pi^*(\text{EWO})$ [8%]                                                                                                                                  | 259 → 266 [0.35]<br>260 → 266 [0.35]<br>248 → 265 [0.22]<br>258 → 267 [0.20]                     |
| 317 (0.29)        | Chalcone:<br>$\pi(\text{EWO}) \rightarrow \pi^*(\text{EWO}), d(\text{Pd})_{\text{LUMO}}$ [20%]<br>$\pi(\text{PPh}_2, \text{EWO}) \rightarrow \pi^*(\text{EWO}), d(\text{Pd})_{\text{LUMO}}$ [19%]<br>$\pi(\text{EWO}, \text{PPh}_2), d(\text{Pd}) \rightarrow \pi^*(\text{EWO})$ [13%]<br>$\pi(\text{EWO}), d(\text{Pd}) \rightarrow \pi^*(\text{EWO})$ [12%]<br>$lp(\text{Cl}), \pi(\text{PPh}_2) \rightarrow \pi^*(\text{EWO}), d(\text{Pd})_{\text{LUMO}}$ [11%] | 247 → 265 [0.32]<br>248 → 265 [0.31]<br>259 → 266 [0.26]<br>260 → 266 [0.24]<br>244 → 265 [0.24] |
| 315 (0.25)        | Chalcone:<br>$\pi(\text{EWO}) \rightarrow \pi^*(\text{EWO})$ [47%]<br>$\pi(\text{PPh}_2, \text{EWO}) \rightarrow \pi^*(\text{EWO}), d(\text{Pd})_{\text{LUMO}}$ [24%]                                                                                                                                                                                                                                                                                               | 261 → 267 [0.48]<br>248 → 265 [0.35]                                                             |

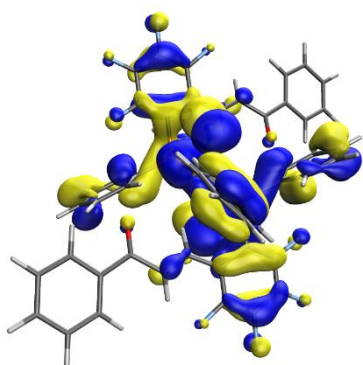

MO 262 (HOMO-2): -0.236 Ha  
**PPh<sub>2</sub> (29+29), PdCl<sub>2</sub> (22) [Cl (9+9)], EWO (10+10)**

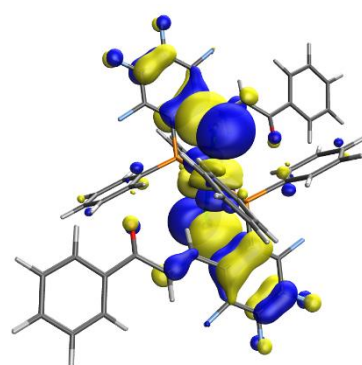

MO 263 (HOMO-1): -0.234 Ha  
**PdCl<sub>2</sub> (77) [Cl (31+31)], EWO (9+9)**

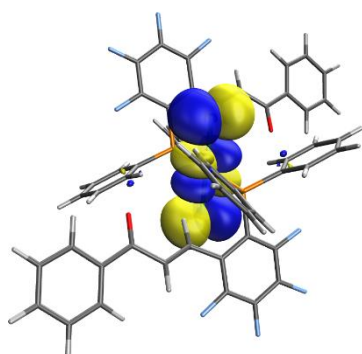

MO 264 (HOMO): -0.227 Ha  
**PdCl<sub>2</sub> (97) [Pd (33)]**

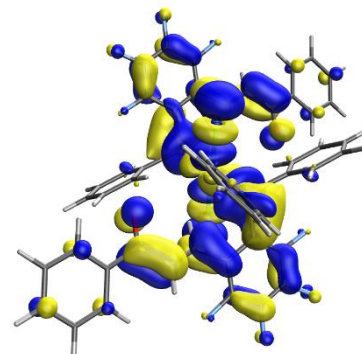

MO 265 (LUMO): -0.096 Ha  
**PdCl<sub>2</sub> (41) [Pd (24)], EWO (19+19), PPh<sub>2</sub> (10+10)**

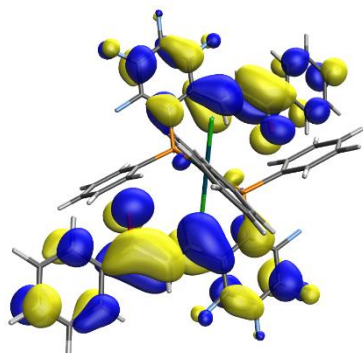

MO 266 (LUMO+1): -0.085 Ha  
**EWO (48+48)**

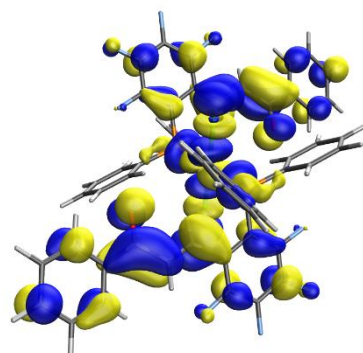

MO 267 (LUMO+2): -0.080 Ha  
**EWO (33+33), PdCl<sub>2</sub> (22), PPh<sub>2</sub> (6+6)**

**Figure S18.** Relevant molecular orbitals for **1L<sup>1</sup>** (from HOMO-2 to LUMO+2). Energies and fragment contributions are also shown.



**Table S6.** Absorption parameters for **5L<sup>1</sup>**.

| $\lambda$ (f) | Assignment                                                                                                               | OM                           |
|---------------|--------------------------------------------------------------------------------------------------------------------------|------------------------------|
| 349 (0.16)    | Chalcone:<br>$\pi(\text{PPh}_2, \text{EWO}) \rightarrow \pi^*(\text{EWO})_{\text{LUMO}}$ [71%]                           | 262 $\rightarrow$ 265 [0.60] |
|               | $\pi(\text{EWO}) \rightarrow \pi^*(\text{EWO})_{\text{LUMO}}$ [17%]                                                      | 260 $\rightarrow$ 265 [0.29] |
| 333 (0.18)    | Chalcone:<br>$\pi(\text{EWO}) \rightarrow \pi^*(\text{EWO})_{\text{LUMO}}$ [60%]                                         | 260 $\rightarrow$ 265 [0.55] |
|               | $\pi(\text{PPh}_2, \text{EWO}) \rightarrow \pi^*(\text{EWO})_{\text{LUMO}}$ [15%]                                        | 262 $\rightarrow$ 265 [0.27] |
|               | $\pi(\text{PPh}_2) \rightarrow \pi^*(\text{EWO})_{\text{LUMO}}$ [10%]                                                    | 258 $\rightarrow$ 265 [0.22] |
| 324 (0.26)    | ILCT ( $\text{PPh}_2 \rightarrow \text{EWO}$ ):<br>$\pi(\text{PPh}_2) \rightarrow \pi^*(\text{EWO})_{\text{LUMO}}$ [70%] | 258 $\rightarrow$ 265 [0.59] |
|               | $\pi(\text{EWO}) \rightarrow \pi^*(\text{EWO})_{\text{LUMO}}$ [11%]                                                      | 260 $\rightarrow$ 265 [0.24] |
| 317 (0.17)    | Chalcone:<br>$\pi(\text{EWO}) \rightarrow \pi^*(\text{EWO})$ [79%]                                                       | 259 $\rightarrow$ 266 [0.63] |
| 303 (0.14)    | LMCT ( $\text{PPh}_2 \rightarrow \text{Pt}$ ):<br>$\pi(\text{PPh}_2, \text{EWO}) \rightarrow \text{d}(\text{Pt})$ [36%]  | 262 $\rightarrow$ 267 [0.42] |
|               | $\pi(\text{EWO}) \rightarrow \text{d}(\text{Pt})$ [28%]                                                                  | 260 $\rightarrow$ 267 [0.37] |
| 296 (0.14)    | LMCT ( $\text{EWO} \rightarrow \text{Pt}$ ):<br>$\pi(\text{PPh}_2, \text{EWO}) \rightarrow \text{d}(\text{Pt})$ [35%]    | 262 $\rightarrow$ 267 [0.42] |
|               | $\pi(\text{EWO}) \rightarrow \text{d}(\text{Pt})$ [13%]                                                                  | 260 $\rightarrow$ 267 [0.26] |

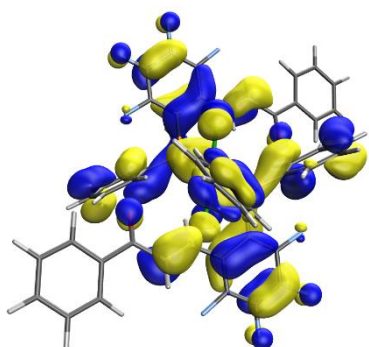

MO 262 (HOMO-2): -0.239 Ha  
**PPh<sub>2</sub> (25+25), EWO (22+22), PtCl<sub>2</sub> (7)**

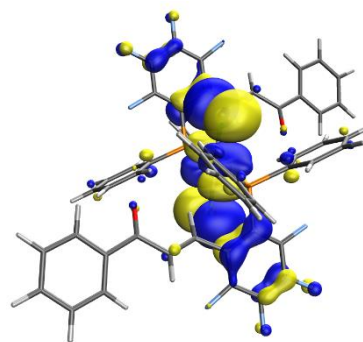

MO 263 (HOMO-1): -0.231 Ha  
**PtCl<sub>2</sub> (85) [Cl (32+32)], EWO (5+5)**

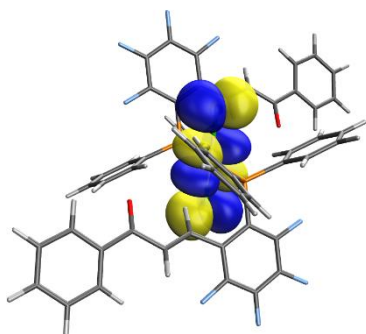

MO 264 (HOMO): -0.218 Ha  
**PtCl<sub>2</sub> (98) [Pt (44)]**

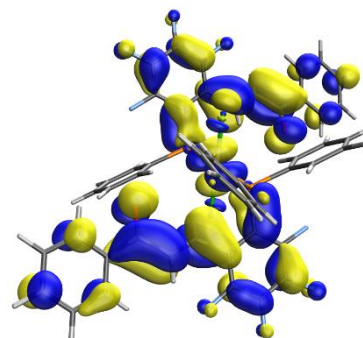

MO 265 (LUMO): -0.088 Ha  
**EWO (43+43), PtCl<sub>2</sub> (7), PPh<sub>2</sub> (3+3)**

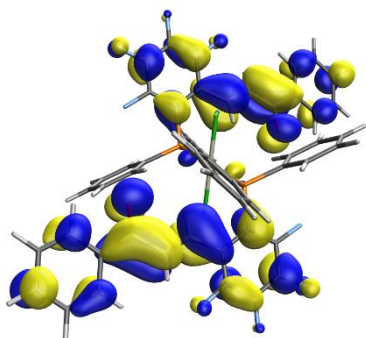

MO 266 (LUMO+1): -0.085 Ha  
**EWO (48+48)**

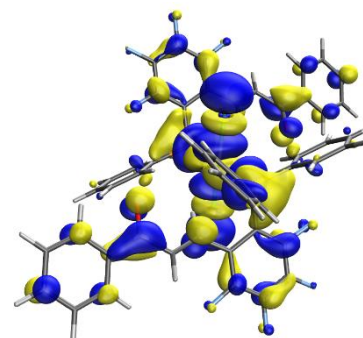

MO 267 (LUMO+2): -0.065 Ha  
**PtCl<sub>2</sub> (51) [Pt (28)], EWO (12+12), PPh<sub>2</sub> (12+12)**

**Figure S19.** Molecular orbitals for **5L<sup>1</sup>** (from HOMO-2 to LUMO+2). Energies and fragment contributions are also shown.

**Table S7.** Absorption parameters for **4L<sup>1</sup>**.

| $\lambda$ (f) | Assignment                                                                                                                 | OM                           |
|---------------|----------------------------------------------------------------------------------------------------------------------------|------------------------------|
| 350 (0.19)    | Chalcone:<br>$\pi(\text{EWO}, \text{PPh}_2)_{\text{HOMO}} \rightarrow \pi^*(\text{EWO})_{\text{LUMO}}$ [77%]               | 260 $\rightarrow$ 261 [0.62] |
|               | $\pi(\text{EWO}) \rightarrow \pi^*(\text{EWO})_{\text{LUMO}}$ [17%]                                                        | 258 $\rightarrow$ 261 [0.29] |
| 333 (0.32)    | Chalcone:<br>$\pi(\text{EWO}) \rightarrow \pi^*(\text{EWO})_{\text{LUMO}}$ [71%]                                           | 258 $\rightarrow$ 261 [0.60] |
|               | $\pi(\text{EWO}, \text{PPh}_2)_{\text{HOMO}} \rightarrow \pi^*(\text{EWO})_{\text{LUMO}}$ [17%]                            | 260 $\rightarrow$ 261 [0.29] |
| 325 (0.16)    | ILCT (PPh <sub>2</sub> $\rightarrow$ EWO):<br>$\pi(\text{PPh}_2), \text{d}(\text{Pd}) \rightarrow \pi^*(\text{EWO})$ [49%] | 257 $\rightarrow$ 262 [0.50] |
|               | $\pi(\text{EWO}) \rightarrow \pi^*(\text{EWO})$ [23%]                                                                      | 259 $\rightarrow$ 262 [0.34] |
| 322 (0.12)    | Chalcone:<br>$\pi(\text{EWO}) \rightarrow \pi^*(\text{EWO})$ [42%]                                                         | 259 $\rightarrow$ 262 [0.46] |
|               | $\pi(\text{PPh}_2), \text{d}(\text{Pd}) \rightarrow \pi^*(\text{EWO})$ [38%]                                               | 257 $\rightarrow$ 262 [0.44] |
|               | $\pi(\text{PPh}_2) \rightarrow \pi^*(\text{EWO})_{\text{LUMO}}$ [9%]                                                       | 256 $\rightarrow$ 261 [0.21] |
| 298 (0.12)    | ILCT (Phos $\rightarrow$ EWO):<br>$\pi(\text{PPh}_2) \rightarrow \pi^*(\text{EWO})_{\text{LUMO}}$ [35%]                    | 243 $\rightarrow$ 261 [0.42] |
|               | $\pi(\text{EWO}) \rightarrow \pi^*(\text{EWO})_{\text{LUMO}}$ [20%]                                                        | 245 $\rightarrow$ 261 [0.31] |
|               | $\pi(\text{PPh}_2), \text{d}(\text{Pd}) \rightarrow \pi^*(\text{EWO})$ [16%]                                               | 242 $\rightarrow$ 262 [0.28] |
|               | $\pi(\text{PPh}_2, \text{EWO}, \text{CN}) \rightarrow \pi^*(\text{EWO})$ [9%]                                              | 252 $\rightarrow$ 262 [0.21] |
|               | $\pi(\text{EWO}) \rightarrow \pi^*(\text{EWO})$ [8%]                                                                       | 244 $\rightarrow$ 262 [0.20] |
| 293 (0.11)    | Chalcone:<br>$\pi(\text{PPh}_2) \rightarrow \pi^*(\text{EWO})_{\text{LUMO}}$ [22%]                                         | 243 $\rightarrow$ 261 [0.33] |
|               | $\pi(\text{EWO}) \rightarrow \pi^*(\text{EWO})_{\text{LUMO}}$ [18%]                                                        | 245 $\rightarrow$ 261 [0.30] |
|               | $\pi(\text{EWO}, \text{PPh}_2)_{\text{HOMO}} \rightarrow \pi^*(\text{EWO}), \text{d}(\text{Pd})$ [17%]                     | 260 $\rightarrow$ 263 [0.29] |
|               | $\pi(\text{EWO}) \rightarrow \pi^*(\text{EWO})$ [10%]                                                                      | 244 $\rightarrow$ 262 [0.23] |
| 288 (0.30)    | Chalcone:<br>$\pi(\text{EWO}, \text{PPh}_2)_{\text{HOMO}} \rightarrow \pi^*(\text{EWO}), \text{d}(\text{Pd})$ [52%]        | 260 $\rightarrow$ 263 [0.51] |
|               | $\pi(\text{PPh}_2) \rightarrow \pi^*(\text{EWO})_{\text{LUMO}}$ [13%]                                                      | 243 $\rightarrow$ 261 [0.26] |

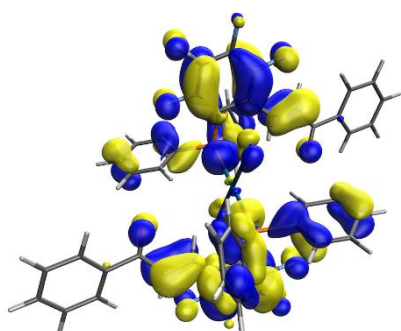

MO 258 (HOMO-2): -0.244 Ha  
EWO (33+33), PPh<sub>2</sub> (15+15)

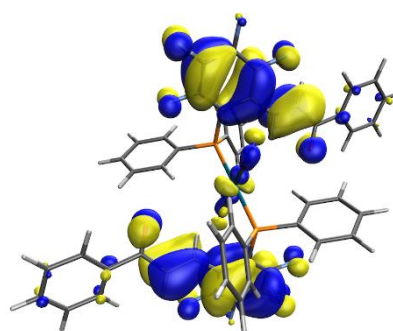

MO 259 (HOMO-1): -0.243 Ha  
EWO (48+48)

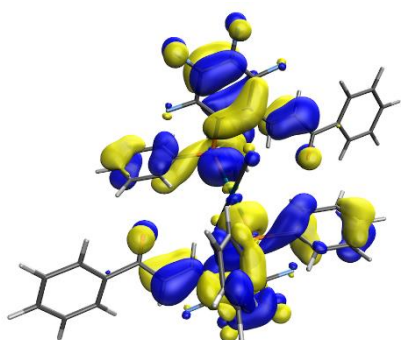

MO 260 (HOMO): -0.241 Ha  
EWO (28+28), PPh<sub>2</sub> (20+20)

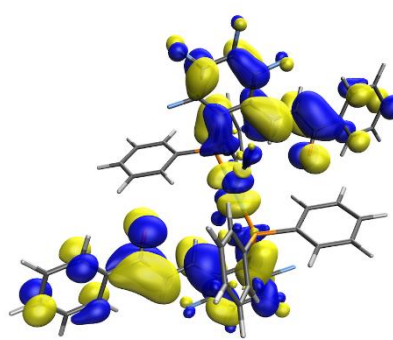

MO 261 (LUMO): -0.092 Ha  
EWO (43+43), Pd(CN)<sub>2</sub> (8)

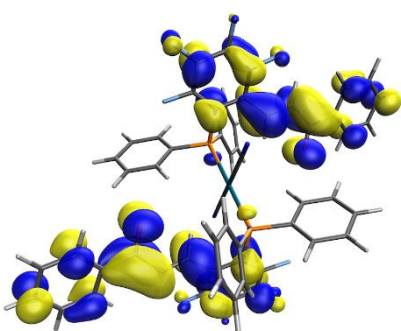

MO 262 (LUMO+1): -0.089 Ha  
EWO (48+48)

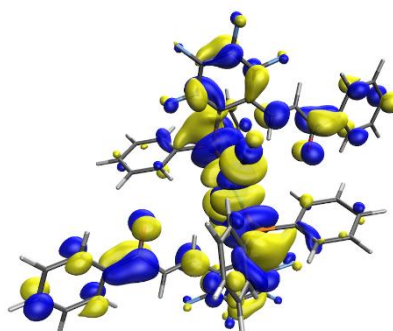

MO 263 (LUMO+2): -0.065 Ha  
Pd(CN)<sub>2</sub> (40) [Pd (26)], EWO (16+16), PPh<sub>2</sub> (15+15)

**Figure S20.** Molecular orbitals for **4L<sup>1</sup>** (from HOMO-2 to LUMO+2). Energies and fragment contributions are also shown.

## Phosphorescence emission

Calculated triplet states (wavelengths in nm) for the **L**<sup>1</sup> derivatives in ground state, together with their main monoexcitations. For each entry, main contributions of the molecular orbitals involved in the transition and their coefficients are shown.

**Table S8.** Potentially phosphorescent emissions computed for **L**<sup>1</sup>. Note that neither of those fit with the experimental emission with maximum around 600 nm.

| $T_n$         | Assignment                                                     | OM                           |
|---------------|----------------------------------------------------------------|------------------------------|
| 515 ( $T_1$ ) | Chalcone:                                                      |                              |
|               | $\pi(\text{EWO}) \rightarrow \pi^*(\text{EWO})_{LUMO}$ [74%]   | 118 $\rightarrow$ 120 [0.61] |
|               | $\pi(\text{PPh}_2)_{HOMO} \rightarrow \pi^*(\text{EWO})$ [10%] | 119 $\rightarrow$ 120 [0.22] |
| 456 ( $T_2$ ) | Chalcone:                                                      |                              |
|               | $\pi(\text{EWO}) \rightarrow \pi^*(\text{EWO})_{LUMO}$ [85%]   | 117 $\rightarrow$ 120 [0.65] |
| 410 ( $T_3$ ) | ILCT ( $\text{PPh}_2 \rightarrow \text{EWO}$ ):                |                              |
|               | $\pi(\text{PPh}_2)_{HOMO} \rightarrow \pi^*(\text{EWO})$ [82%] | 119 $\rightarrow$ 120 [0.64] |
|               | $\pi(\text{EWO}) \rightarrow \pi^*(\text{EWO})_{LUMO}$ [10%]   | 118 $\rightarrow$ 120 [0.33] |

\* Reoptimizing  $T_1$

| $\lambda_{Ph}$ | Assignment                                            | OM                          |
|----------------|-------------------------------------------------------|-----------------------------|
| 512            | Chalcone:                                             |                             |
|                | $\pi(\text{EWO}) \leftarrow \pi^*(\text{EWO})$ [90%]  | 115 $\leftarrow$ 120 [0.67] |
|                | $\pi(\text{PPh}_2) \leftarrow \pi^*(\text{EWO})$ [4%] | 116 $\leftarrow$ 120 [0.21] |

**Table S9.** Potentially phosphorescent emissions computed for **1L<sup>1</sup>**. The electronic transition coincident with the emission maximum is highlighted in bold.

| $T_n$                         | Assignment                                                                                             | OM                                                           |
|-------------------------------|--------------------------------------------------------------------------------------------------------|--------------------------------------------------------------|
| <b>667 (<math>T_1</math>)</b> | <b>MLCT (Pd <math>\rightarrow</math> EWO):</b>                                                         |                                                              |
|                               | <b>d(Pd) <math>\rightarrow</math> <math>\pi^*(\text{EWO}), d(\text{Pd})_{LUMO}</math> [71%]</b>        | <b>264 <math>\rightarrow</math> 265 [0.60]</b>               |
|                               | <b>d(Pd) <math>\rightarrow</math> <math>\pi^*(\text{EWO})</math> [20%]</b>                             | <b>264 <math>\rightarrow</math> 267 [0.32]</b>               |
| 575 ( $T_2$ )                 | Chalcone:                                                                                              |                                                              |
|                               | $\pi(\text{EWO}), d(\text{Pd}) \rightarrow \pi^*(\text{EWO}), d(\text{Pd})_{LUMO}$ [25%]               | 260 $\rightarrow$ 265 [0.35]                                 |
|                               | $\pi(\text{EWO}, \text{PPh}_2), d(\text{Pd}) \rightarrow \pi^*(\text{EWO}), d(\text{Pd})_{LUMO}$ [22%] | 259 $\rightarrow$ 265 [0.34]<br>252 $\rightarrow$ 265 [0.24] |
|                               | $\pi(\text{PPh}_2), d(\text{Pd}) \rightarrow \pi^*(\text{EWO}), d(\text{Pd})_{LUMO}$ [12%]             |                                                              |
| 547 ( $T_3$ )                 | LLCT (Cl $\rightarrow$ EWO):                                                                           |                                                              |
|                               | $lp(\text{Cl}) \rightarrow \pi^*(\text{EWO}), d(\text{Pd})_{LUMO}$ [65%]                               | 263 $\rightarrow$ 265 [0.57]                                 |
|                               | $lp(\text{Cl}) \rightarrow \pi^*(\text{EWO})$ [14%]                                                    | 263 $\rightarrow$ 267 [0.26]                                 |
| 507 ( $T_4$ )                 | Chalcone:                                                                                              |                                                              |
|                               | $\pi(\text{EWO}) \rightarrow \pi^*(\text{EWO}), d(\text{Pd})_{LUMO}$ [21%]                             | 261 $\rightarrow$ 265 [0.32]                                 |
|                               | $\pi(\text{EWO}), d(\text{Pd}) \rightarrow \pi^*(\text{EWO})$ [15%]                                    | 260 $\rightarrow$ 266 [0.27]                                 |
|                               | $\pi(\text{EWO}) \rightarrow \pi^*(\text{EWO})$ [15%]                                                  | 261 $\rightarrow$ 267 [0.27]                                 |
|                               | $\pi(\text{EWO}, \text{PPh}_2), d(\text{Pd}) \rightarrow \pi^*(\text{EWO})$ [14%]                      | 259 $\rightarrow$ 266 [0.26]                                 |
| 505 ( $T_5$ )                 | Chalcone:                                                                                              |                                                              |
|                               | $\pi(\text{EWO}) \rightarrow \pi^*(\text{EWO})$ [31%]                                                  | 261 $\rightarrow$ 266 [0.40]                                 |
|                               | $\pi(\text{EWO}), d(\text{Pd}) \rightarrow \pi^*(\text{EWO}), d(\text{Pd})_{LUMO}$ [12%]               | 260 $\rightarrow$ 265 [0.24]                                 |
|                               | $\pi(\text{EWO}, \text{PPh}_2), d(\text{Pd}) \rightarrow \pi^*(\text{EWO}), d(\text{Pd})_{LUMO}$ [10%] | 259 $\rightarrow$ 265 [0.22]                                 |

\* Reoptimization of  $T_1$  led to profound structural change, presumably not accessible in the crystalline structure.

**Table S10.** Potentially phosphorescent emissions computed for **5L**<sup>1</sup>. Note that no sign of luminescence is observed for this compound.

| $T_n$         | Assignment                                                                 | OM                           |
|---------------|----------------------------------------------------------------------------|------------------------------|
| 555 ( $T_1$ ) | MLCT (Pt $\rightarrow$ EWO):                                               |                              |
|               | d(Pt) $\rightarrow$ $\pi^*(\text{EWO})_{LUMO}$ [62%]                       | 264 $\rightarrow$ 265 [0.56] |
|               | d(Pt) $\rightarrow$ $\pi^*(\text{EWO})$ [39%]                              | 264 $\rightarrow$ 267 [0.38] |
| 505 ( $T_2$ ) | Chalcone:                                                                  |                              |
|               | $\pi(\text{EWO}) \rightarrow \pi^*(\text{EWO})$ [32%]                      | 259 $\rightarrow$ 266 [0.40] |
|               | $\pi(\text{EWO}) \rightarrow \pi^*(\text{EWO})_{LUMO}$ [21%]               | 260 $\rightarrow$ 265 [0.32] |
|               | $\pi(\text{PPh}_2, \text{EWO}) \rightarrow \pi^*(\text{EWO})_{LUMO}$ [17%] | 262 $\rightarrow$ 265 [0.30] |
| 505 ( $T_3$ ) | Chalcone:                                                                  |                              |
|               | $\pi(\text{EWO}) \rightarrow \pi^*(\text{EWO})_{LUMO}$ [33%]               | 259 $\rightarrow$ 265 [0.41] |
|               | $\pi(\text{EWO}) \rightarrow \pi^*(\text{EWO})$ [20%]                      | 260 $\rightarrow$ 266 [0.32] |
|               | $\pi(\text{PPh}_2, \text{EWO}) \rightarrow \pi^*(\text{EWO})$ [16%]        | 262 $\rightarrow$ 266 [0.28] |

**Table S11.** Potentially phosphorescent emissions computed for **4L**<sup>1</sup>. Note that no sign of luminescence is observed for this compound. Remarkably, no involvement of palladium orbitals is predicted.

| $T_n$         | Assignment                                                                        | OM                           |
|---------------|-----------------------------------------------------------------------------------|------------------------------|
| 510 ( $T_1$ ) | Chalcone:                                                                         |                              |
|               | $\pi(\text{EWO}) \rightarrow \pi^*(\text{EWO})$ [37%]                             | 259 $\rightarrow$ 262 [0.43] |
|               | $\pi(\text{EWO}, \text{PPh}_2)_{HOMO} \rightarrow \pi^*(\text{EWO})_{LUMO}$ [23%] | 260 $\rightarrow$ 261 [0.34] |
|               | $\pi(\text{EWO}) \rightarrow \pi^*(\text{EWO})_{LUMO}$ [18%]                      | 258 $\rightarrow$ 261 [0.30] |
| 510 ( $T_2$ ) | Chalcone:                                                                         |                              |
|               | $\pi(\text{EWO}) \rightarrow \pi^*(\text{EWO})_{LUMO}$ [39%]                      | 259 $\rightarrow$ 261 [0.44] |
|               | $\pi(\text{EWO}, \text{PPh}_2)_{HOMO} \rightarrow \pi^*(\text{EWO})$ [21%]        | 260 $\rightarrow$ 262 [0.32] |
|               | $\pi(\text{EWO}) \rightarrow \pi^*(\text{EWO})$ [18%]                             | 258 $\rightarrow$ 262 [0.30] |
| 444 ( $T_3$ ) | Chalcone:                                                                         |                              |
|               | $\pi(\text{EWO}) \rightarrow \pi^*(\text{EWO})$ [34%]                             | 253 $\rightarrow$ 262 [0.41] |
|               | $\pi(\text{EWO}) \rightarrow \pi^*(\text{EWO})_{LUMO}$ [33%]                      | 254 $\rightarrow$ 261 [0.40] |
| 444 ( $T_4$ ) | Chalcone:                                                                         |                              |
|               | $\pi(\text{EWO}) \rightarrow \pi^*(\text{EWO})$ [34%]                             | 254 $\rightarrow$ 262 [0.41] |
|               | $\pi(\text{EWO}) \rightarrow \pi^*(\text{EWO})_{LUMO}$ [33%]                      | 253 $\rightarrow$ 261 [0.40] |

## Fluorescence emission

Calculated fluorescence emission (wavelengths in nm) for the  $L^1$  derivatives in the first excited singlet state, together their main monoexcitations. For each entry, main contributions of the molecular orbitals involved in the transition and their coefficients are shown.

**Table S12.** Potentially fluorescent emissions computed for  $L^1$ . Note that since the two first singlets are centred in perfluorinated chalcone framework, an expected deexcitation would promote the fluorescence emission at 580 nm, that satisfactorily reproduce the experimental emission (short lifetime support fluorescent behaviour).

| $\lambda_{Fl}$ | Assignment                                             | OM                          |
|----------------|--------------------------------------------------------|-----------------------------|
| 580            | Chalcone:                                              |                             |
|                | $\pi(\text{EWO}) \leftarrow \pi^*(\text{EWO})$ [59%]   | 119 $\leftarrow$ 120 [0.54] |
|                | $\pi(\text{PPh}_2) \leftarrow \pi^*(\text{EWO})$ [28%] | 118 $\leftarrow$ 120 [0.37] |
|                | $\pi(\text{EWO}) \leftarrow \pi^*(\text{EWO})$ [13%]   | 117 $\leftarrow$ 120 [0.25] |
| 572            | Chalcone:                                              |                             |
|                | $\pi(\text{EWO}) \leftarrow \pi^*(\text{EWO})$ [84%]   | 117 $\leftarrow$ 120 [0.65] |
|                | $\pi(\text{EWO}) \leftarrow \pi^*(\text{EWO})$ [11%]   | 119 $\leftarrow$ 120 [0.24] |
| 460            | ILCT (PPh <sub>2</sub> $\leftarrow$ EWO):              |                             |
|                | $\pi(\text{PPh}_2) \leftarrow \pi^*(\text{EWO})$ [69%] | 118 $\leftarrow$ 120 [0.59] |
|                | $\pi(\text{EWO}) \leftarrow \pi^*(\text{EWO})$ [31%]   | 119 $\leftarrow$ 120 [0.40] |



**Table S13.** Potentially fluorescent emissions computed for **1L**<sup>1</sup>. Note that neither of those fit with the experimental emission with maximum around 650 nm.

| $\lambda_{Fl}$ | Assignment                                                                                                                                  | OM                                                                                        |
|----------------|---------------------------------------------------------------------------------------------------------------------------------------------|-------------------------------------------------------------------------------------------|
| 896            | MLCT (Cl $\leftarrow$ Pd):<br>lp(Cl) $\leftarrow$ d(Pd) [58%]<br>d(Pd),lp(Cl) $\leftarrow$ d(Pd) [38%]                                      | 263 $\leftarrow$ 265 [0.54]<br>262 $\leftarrow$ 265 [0.44]                                |
| 837            | Pd <i>d-d</i> band:<br>d(Pd),lp(Cl) $\leftarrow$ d(Pd) [46%]<br>lp(Cl) $\leftarrow$ d(Pd) [27%]<br>lp(Cl) $\leftarrow$ d(Pd) [19%]          | 262 $\leftarrow$ 265 [0.48]<br>263 $\leftarrow$ 265 [0.37]<br>261 $\leftarrow$ 265 [0.31] |
| 784            | MLCT (Cl $\leftarrow$ Pd):<br>lp(Cl) $\leftarrow$ d(Pd) [68%]<br>d(Pd),lp(Cl) $\leftarrow$ d(Pd) [8%]                                       | 261 $\leftarrow$ 265 [0.58]<br>262 $\leftarrow$ 265 [0.20]                                |
| 561            | LMCT (Pd $\leftarrow$ EWO):<br>d(Pd),lp(Cl) $\leftarrow$ $\pi^*$ (EWO) [99%]                                                                | 264 $\leftarrow$ 266 [0.70]                                                               |
| 540            | MLCT (PPh <sub>2</sub> ,EWO $\leftarrow$ Pd):<br>$\pi$ (PPh <sub>2</sub> ) $\leftarrow$ d(Pd) [29%]<br>$\pi$ (EWO) $\leftarrow$ d(Pd) [27%] | 257 $\leftarrow$ 265 [0.38]<br>260 $\leftarrow$ 265 [0.37]                                |
| 512            | MLCT (PPh <sub>2</sub> ,EWO $\leftarrow$ Pd):<br>$\pi$ (EWO) $\leftarrow$ d(Pd) [60%]<br>lp(Cl) $\leftarrow$ d(Pd) [27%]                    | 260 $\leftarrow$ 265 [0.55]<br>258 $\leftarrow$ 265 [0.37]                                |
| 495            | MLCT (EWO $\leftarrow$ Pd):<br>$\pi$ (EWO) $\leftarrow$ d(Pd) [93%]                                                                         | 259 $\leftarrow$ 265 [0.68]                                                               |

\* Since the three first singlets involve palladium *d*-orbitals, an expected deexcitation would promote the fluorescence emission at 561 nm having LMCT character

## NMR Spectra

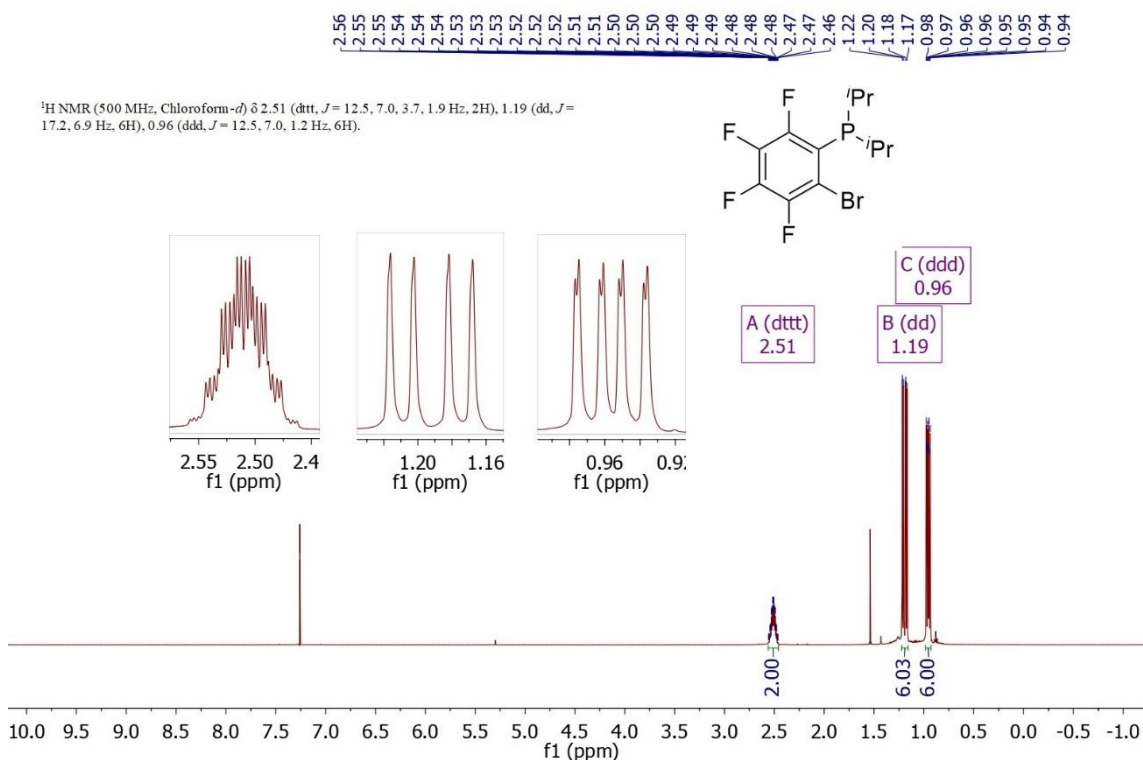

**Figure S21.** <sup>1</sup>H NMR of (2-bromo-3,4,5,6-tetrafluorophenyl)diisopropylphosphine.

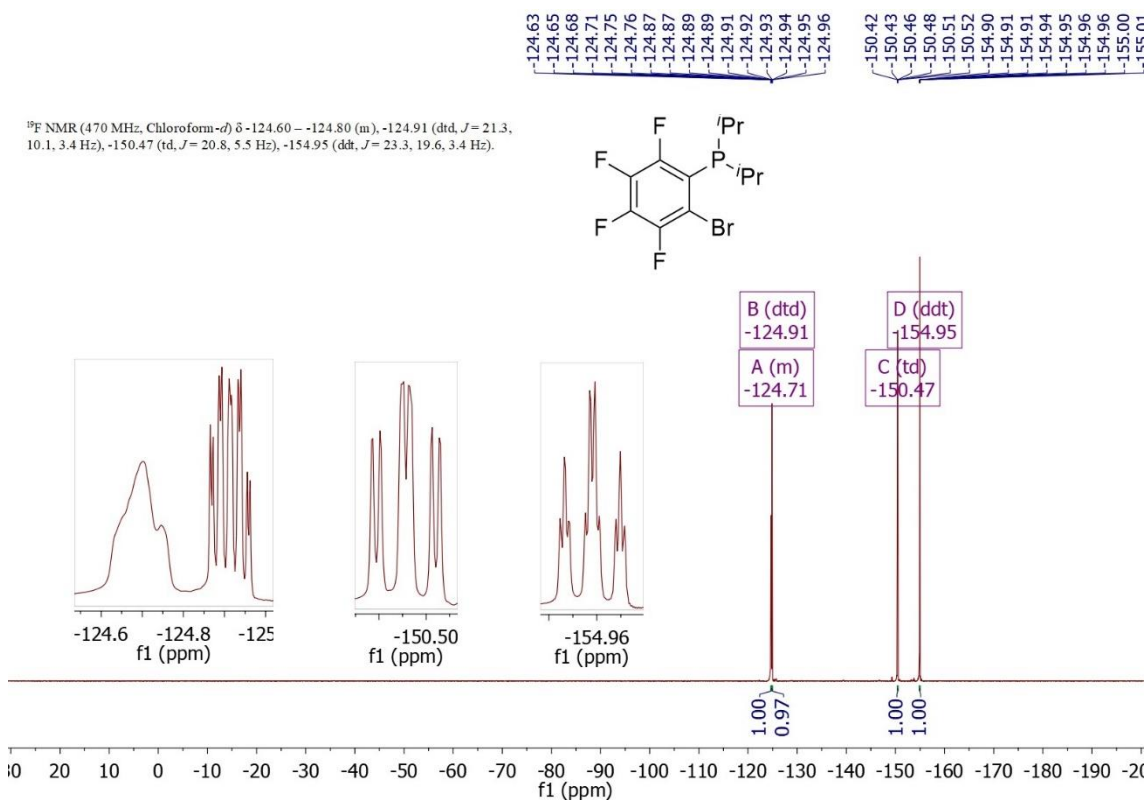

**Figure S22.** <sup>19</sup>F NMR of (2-bromo-3,4,5,6-tetrafluorophenyl)diisopropylphosphine.

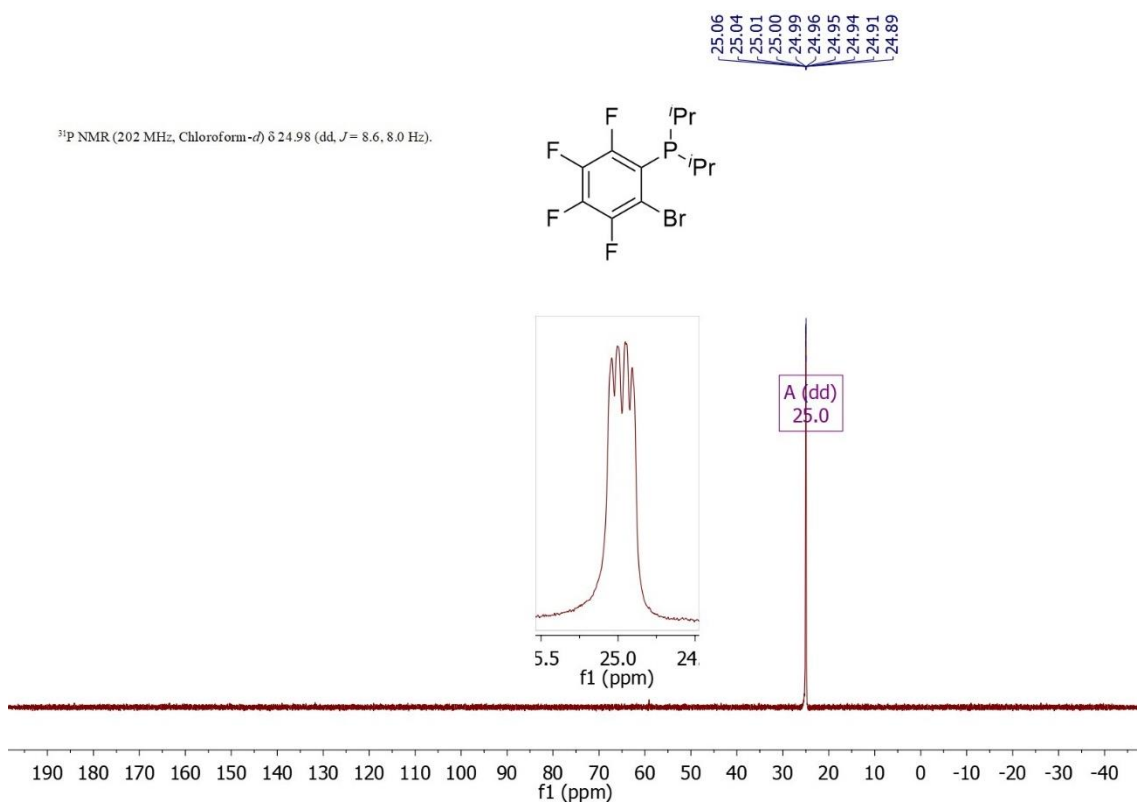

**Figure S23.** <sup>31</sup>P{<sup>1</sup>H} NMR of (2-bromo-3,4,5,6-tetrafluorophenyl)diisopropylphosphine.

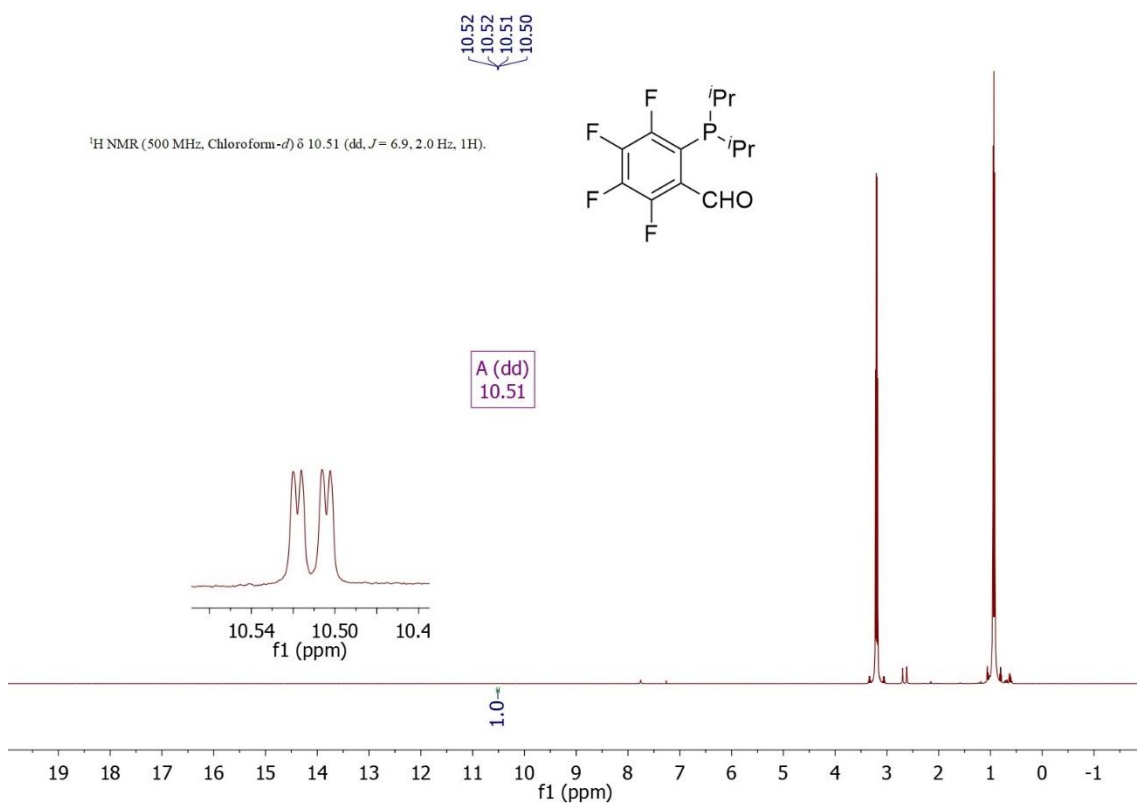

**Figure S24.** <sup>1</sup>H NMR of 2-(diisopropylphosphanyl)-3,4,5,6-tetrafluorobenzaldehyde.

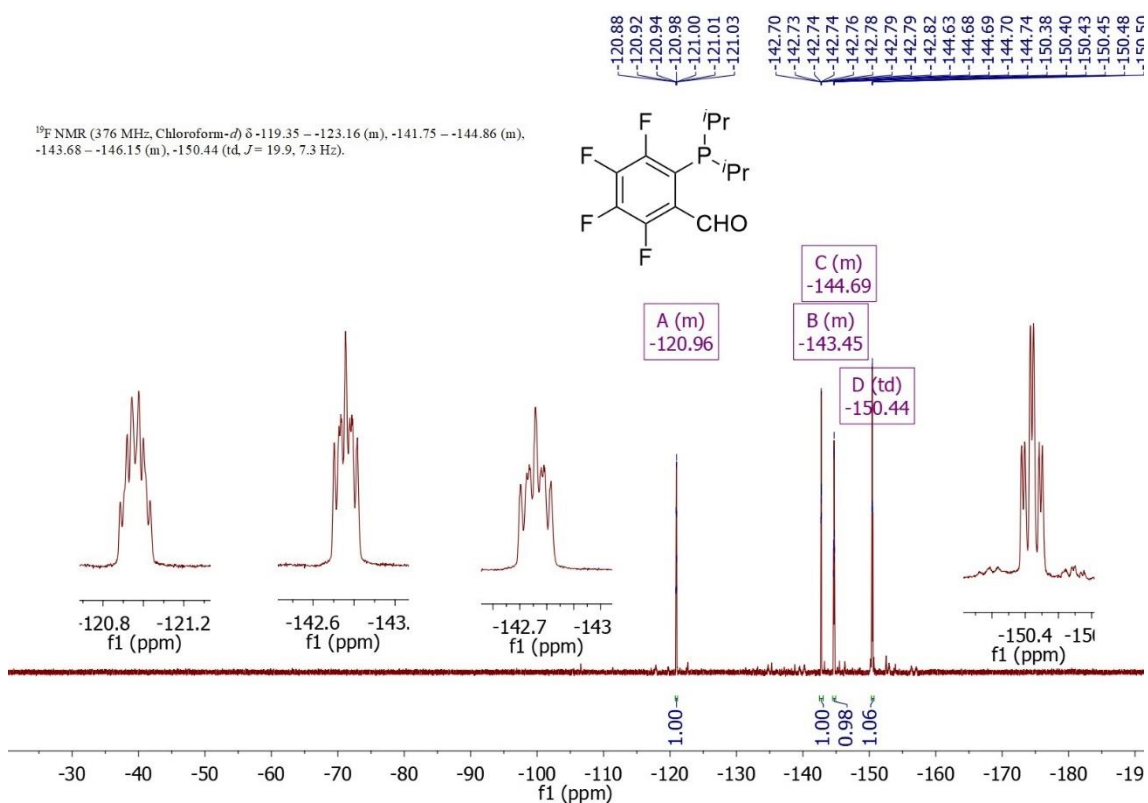

**Figure S25.** <sup>19</sup>F NMR of 2-(diisopropylphosphanyl)-3,4,5,6-tetrafluorobenzaldehyde.

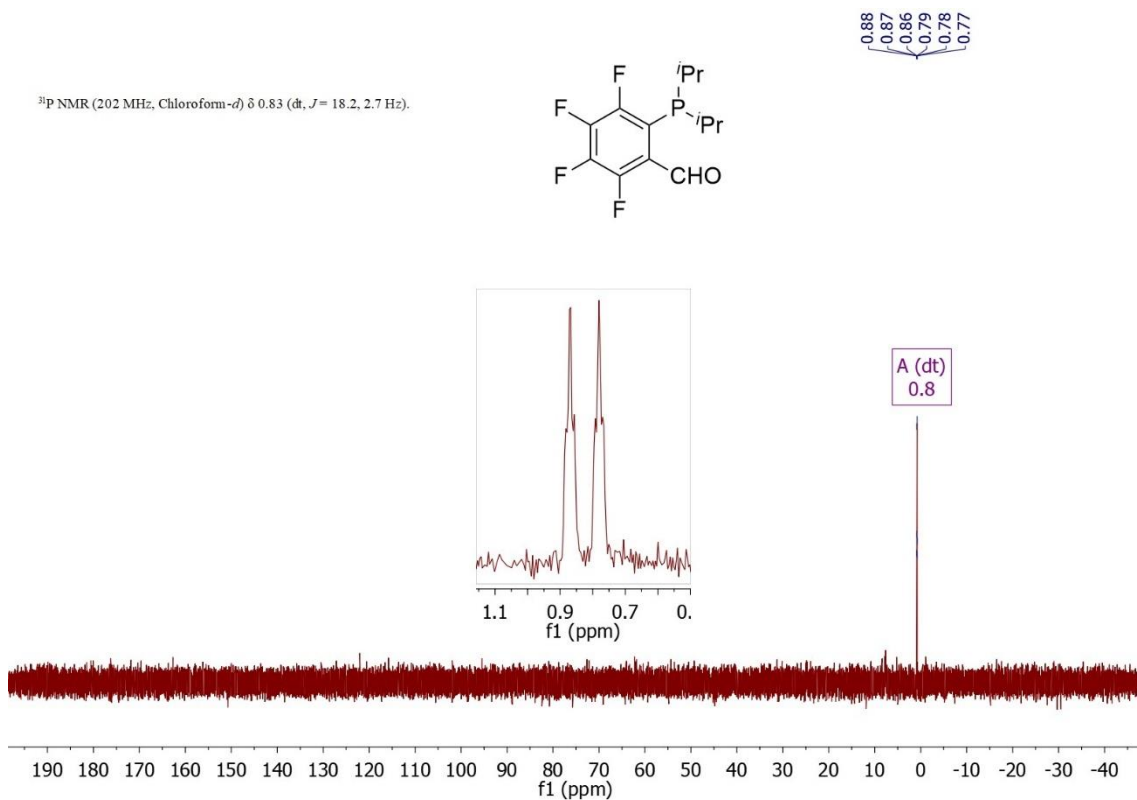

**Figure S26.** <sup>31</sup>P{<sup>1</sup>H} NMR of 2-(diisopropylphosphanyl)-3,4,5,6-tetrafluorobenzaldehyde.

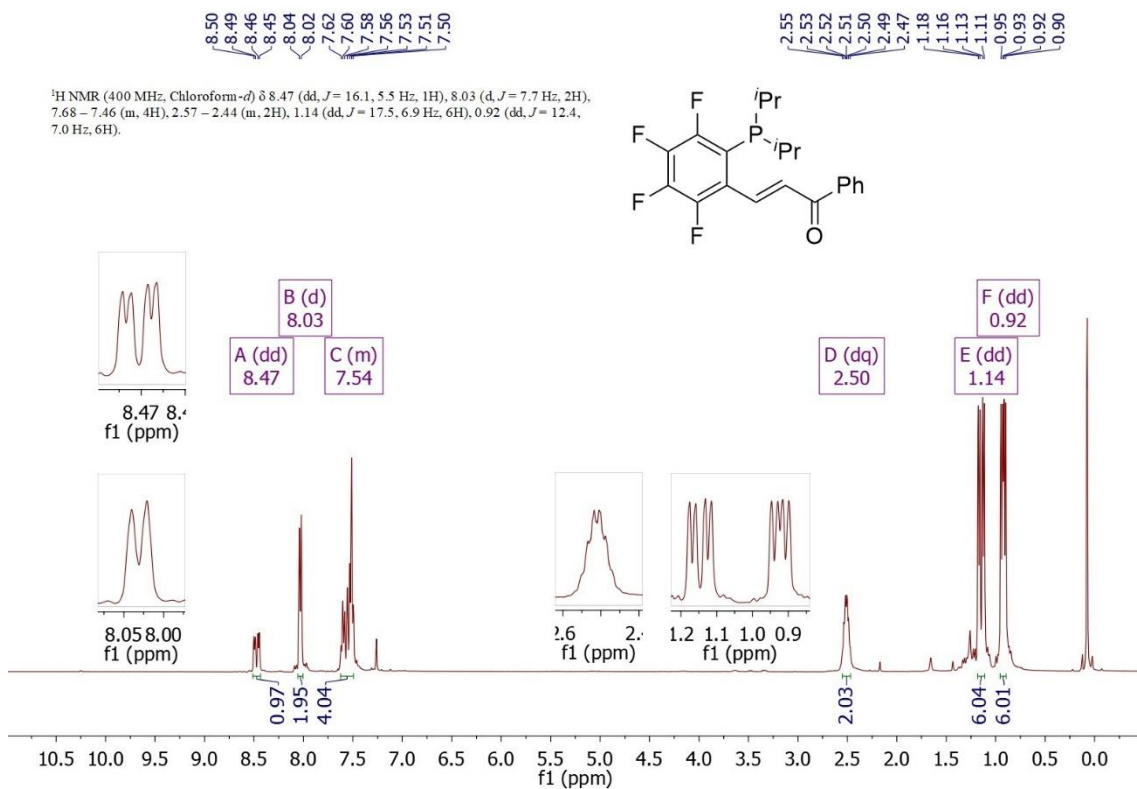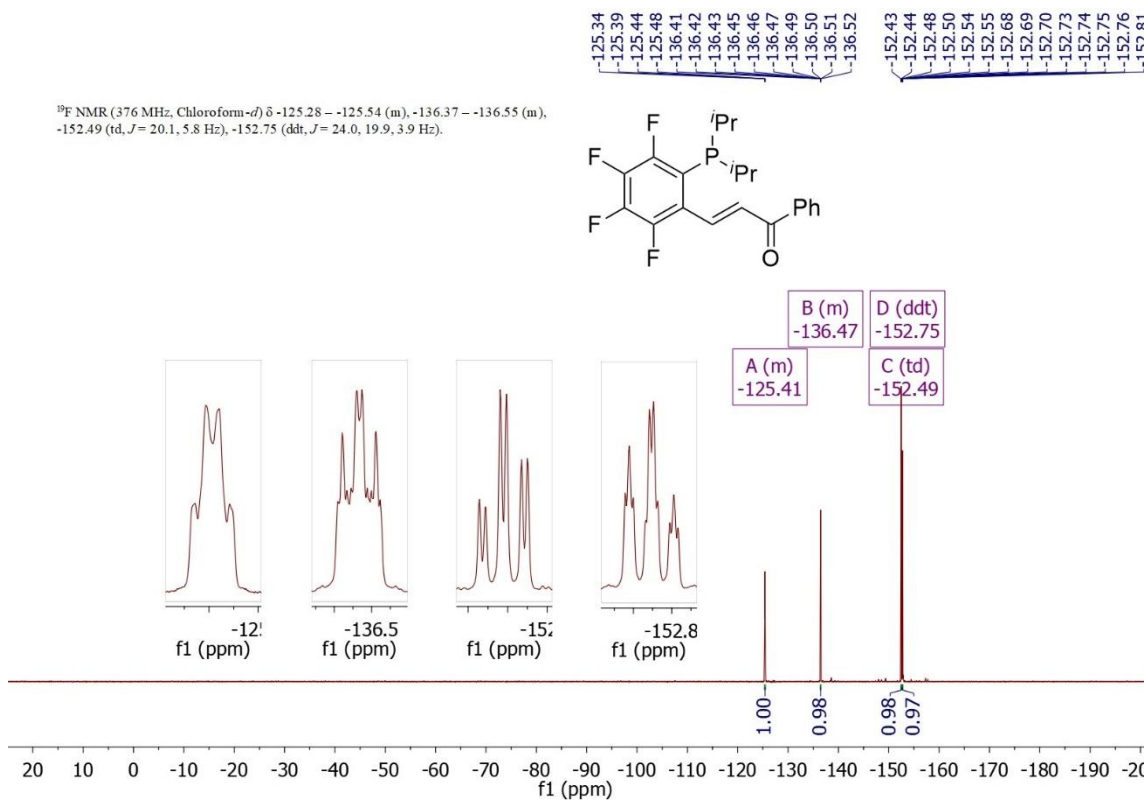

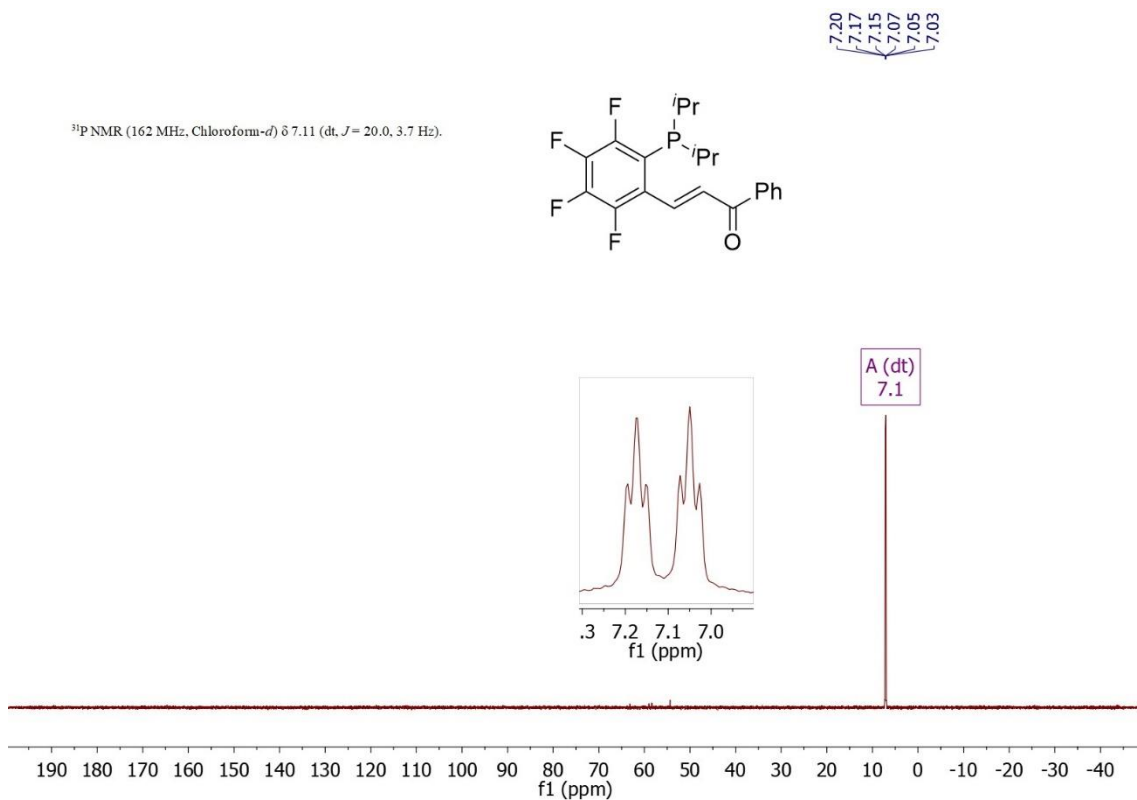

**Figure S29.**  $^{31}\text{P}\{^1\text{H}\}$  NMR of *iPr*-PEWO- $\text{F}_4$  ( $\mathbf{L}^3$ ) in  $\text{CDCl}_3$ .

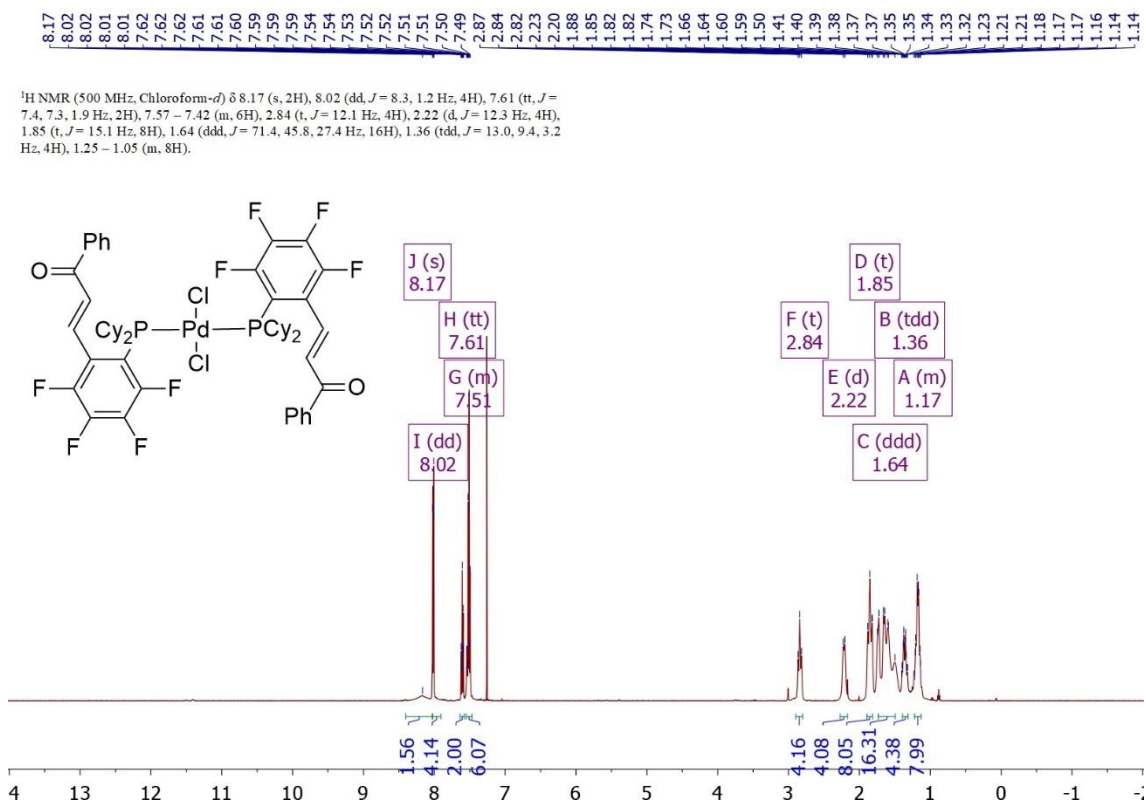

**Figure S30.**  $^1\text{H}$  NMR of *trans*- $\text{PdCl}_2(\text{Cy-PEWO-F}_4)_2$  ( $\mathbf{1L}^2$ ) in  $\text{CDCl}_3$ .

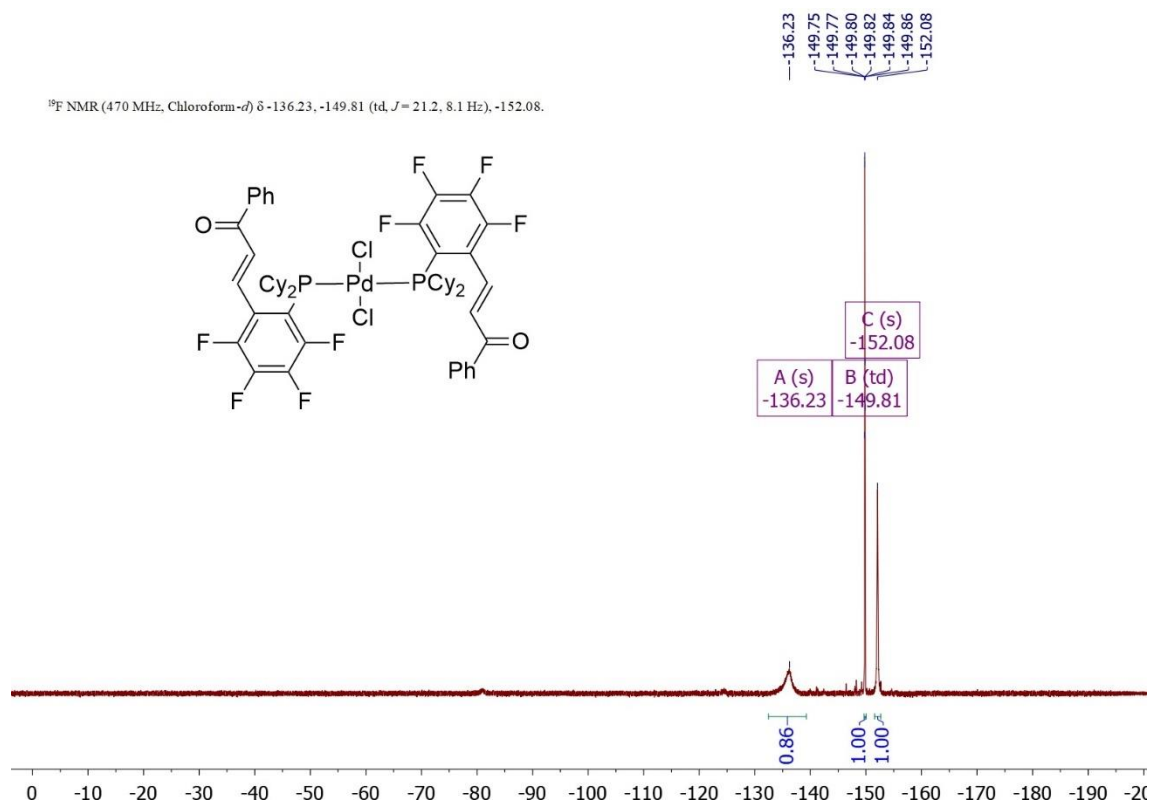

**Figure S31.** <sup>19</sup>F NMR of *trans*-PdCl<sub>2</sub>(Cy-PEWO-F<sub>4</sub>)<sub>2</sub> (**1L**<sup>2</sup>) in CDCl<sub>3</sub>.

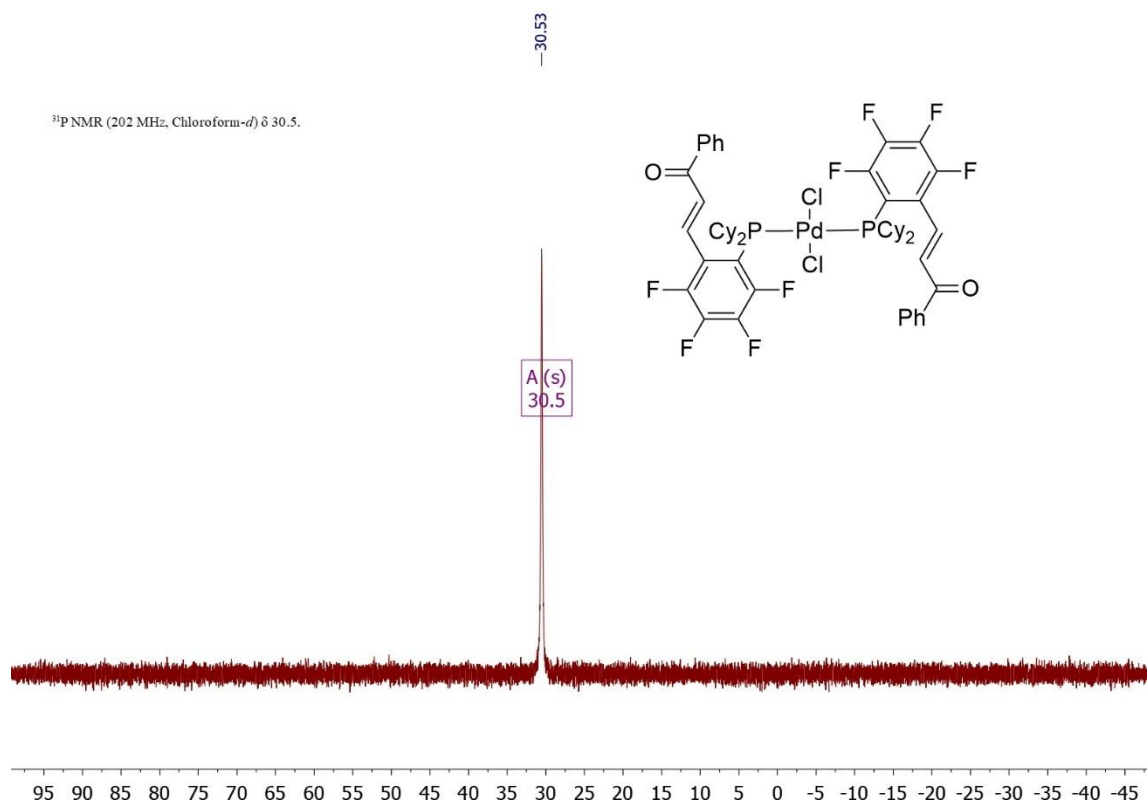

**Figure S32.** <sup>31</sup>P{<sup>1</sup>H} NMR of *trans*-PdCl<sub>2</sub>(Cy-PEWO-F<sub>4</sub>)<sub>2</sub> (**1L**<sup>2</sup>) in CDCl<sub>3</sub>.

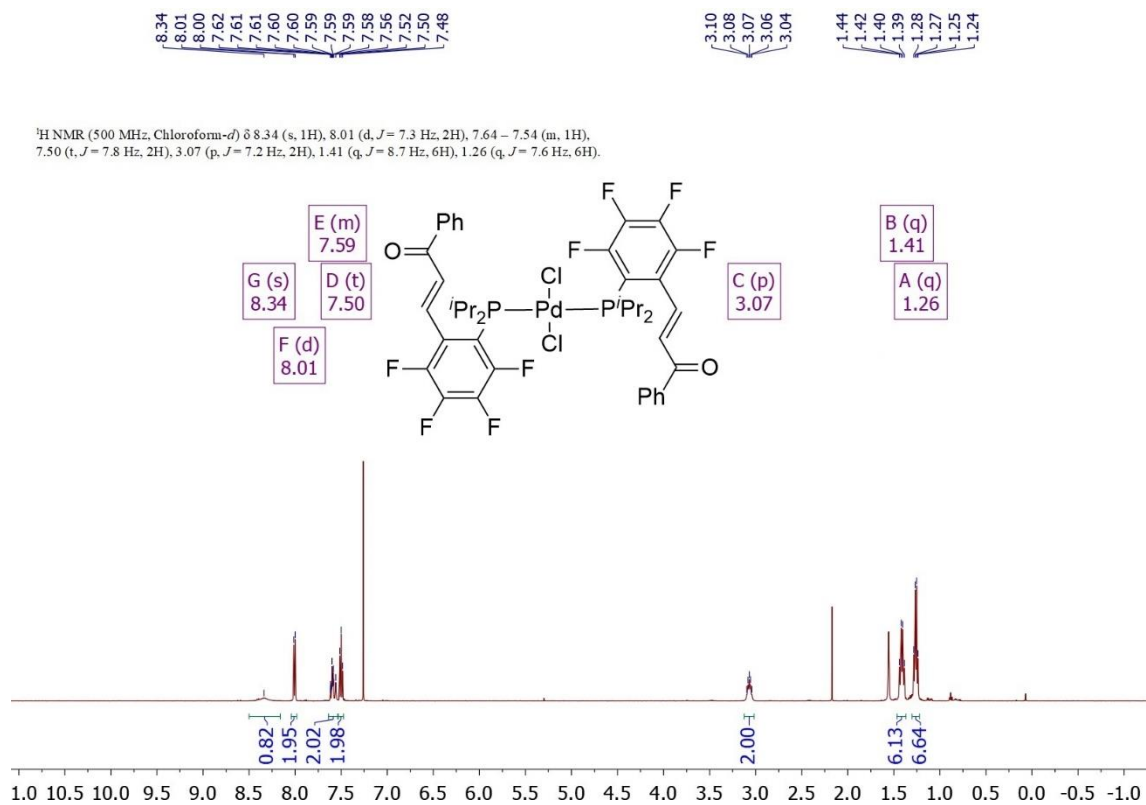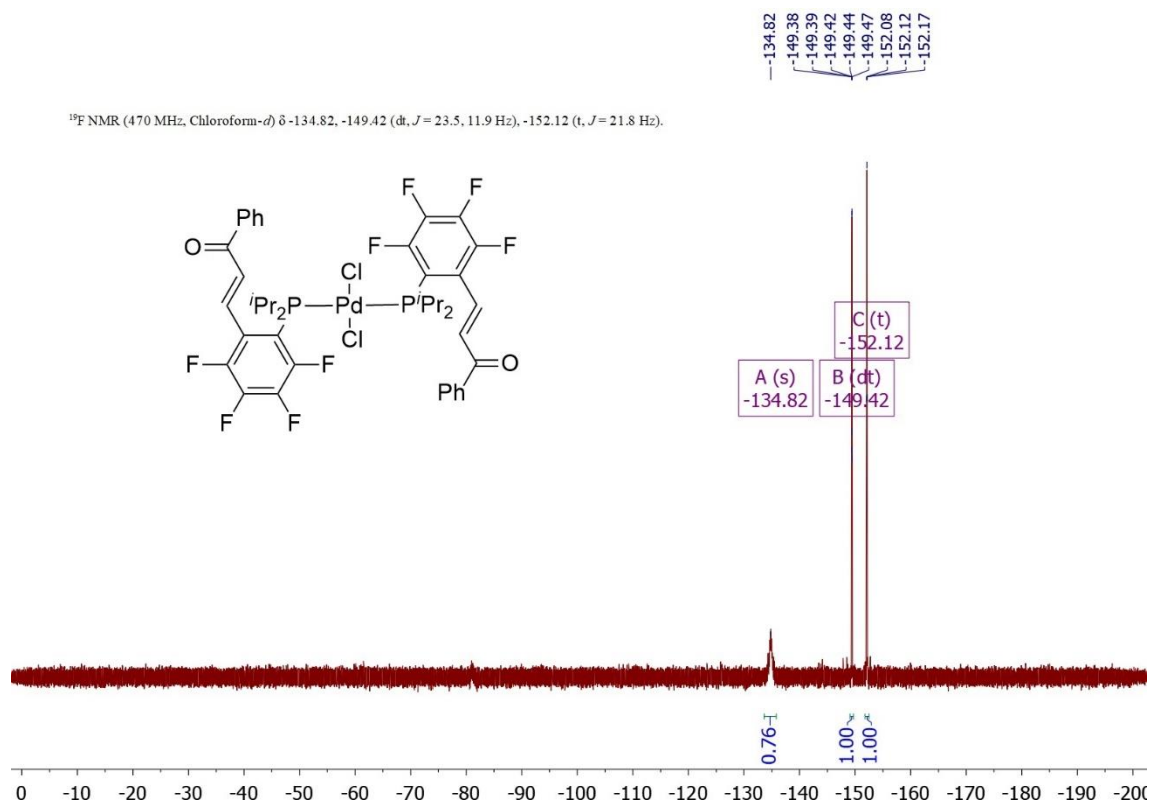



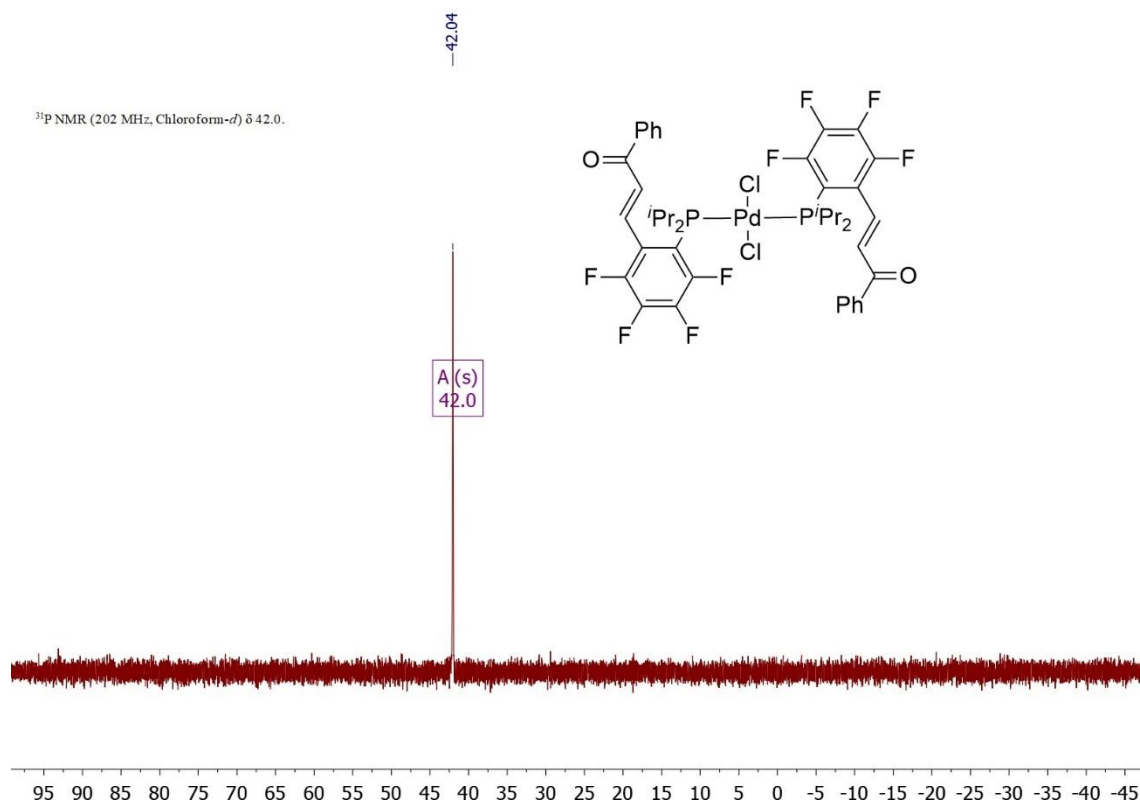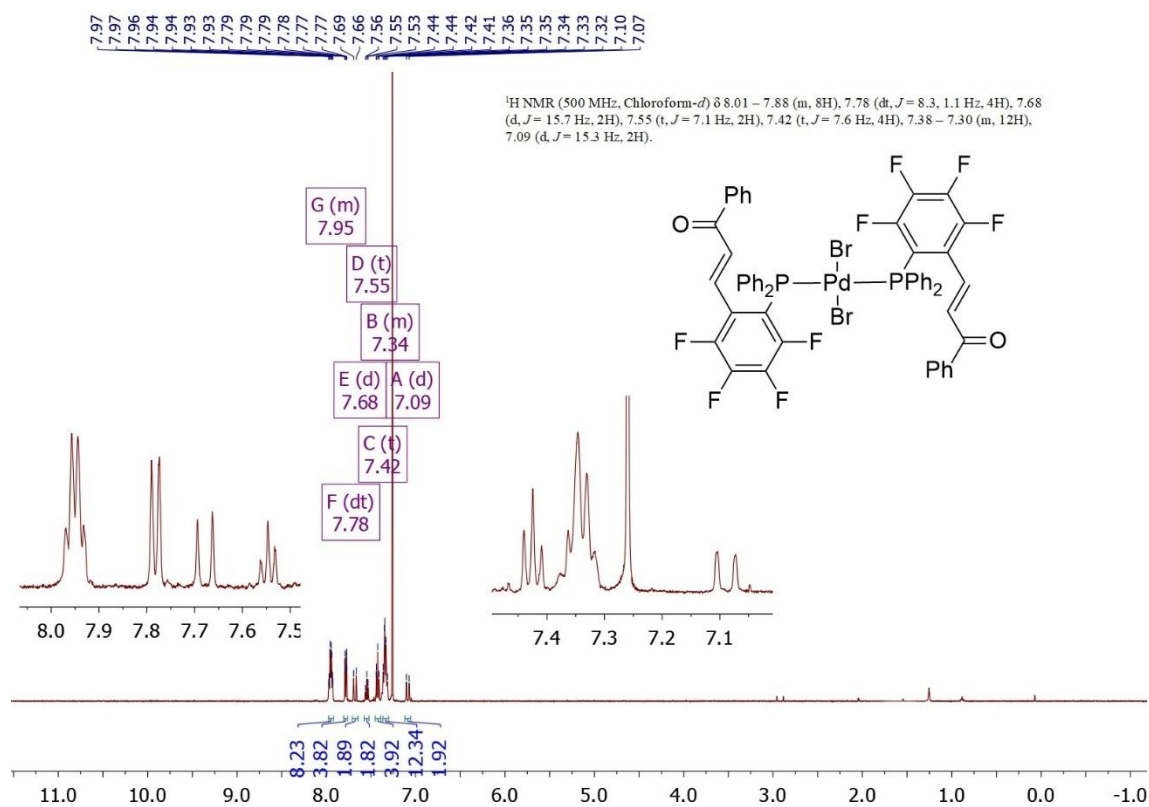

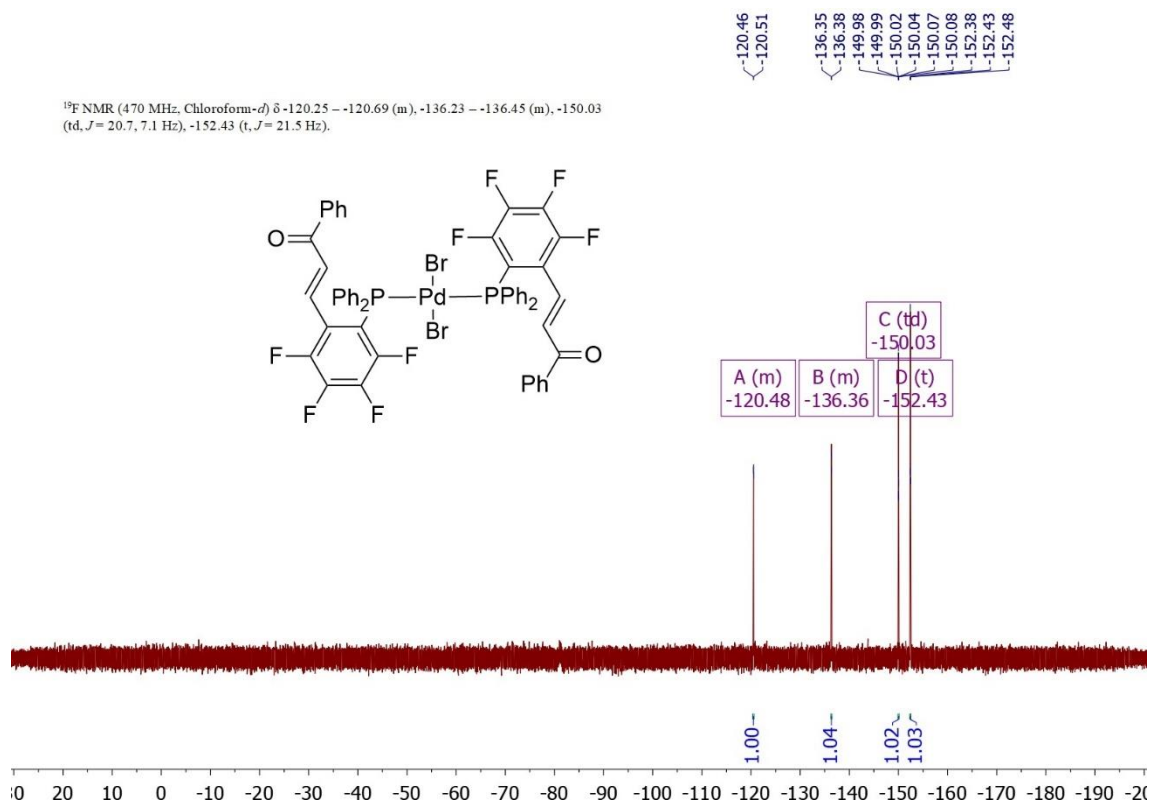

**Figure S37.** <sup>19</sup>F NMR of *trans*-PdBr<sub>2</sub>(Ph-PEWO-F<sub>4</sub>)<sub>2</sub> (**3L**<sup>1</sup>) in CDCl<sub>3</sub>.

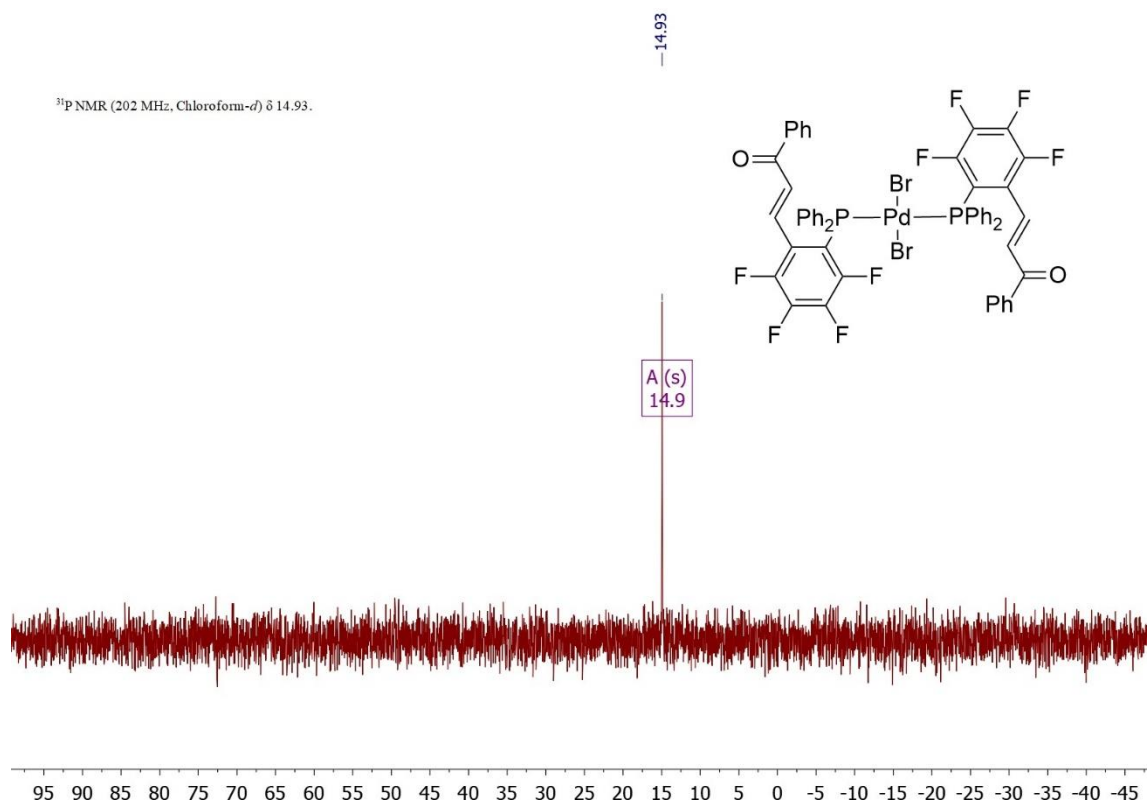

**Figure S38.** <sup>31</sup>P{<sup>1</sup>H} NMR of *trans*-PdBr<sub>2</sub>(Ph-PEWO-F<sub>4</sub>)<sub>2</sub> (**3L**<sup>1</sup>) in CDCl<sub>3</sub>.

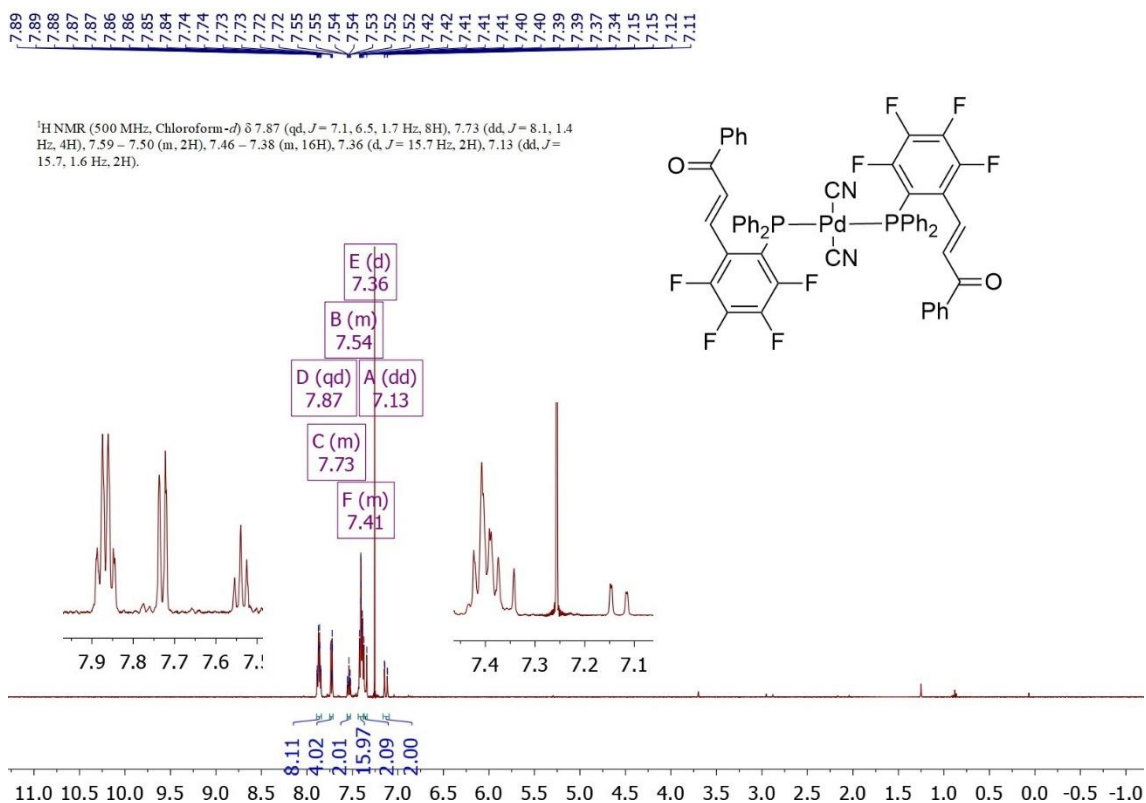

**Figure S39.** <sup>1</sup>H NMR of *trans*-Pd(CN)<sub>2</sub>(Ph-PEWO-F<sub>4</sub>)<sub>2</sub> (**4L<sup>1</sup>**) in CDCl<sub>3</sub>.

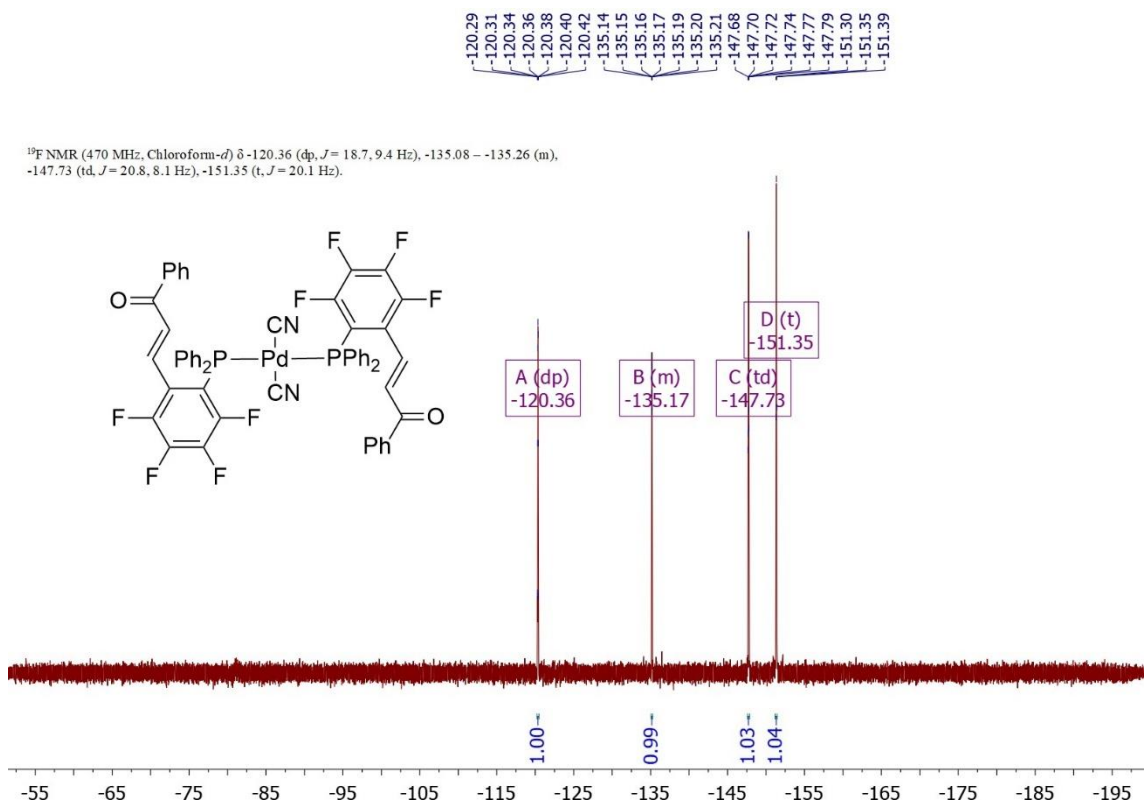

**Figure S40.** <sup>19</sup>F NMR of *trans*-Pd(CN)<sub>2</sub>(Ph-PEWO-F<sub>4</sub>)<sub>2</sub> (**4L<sup>1</sup>**) in CDCl<sub>3</sub>.

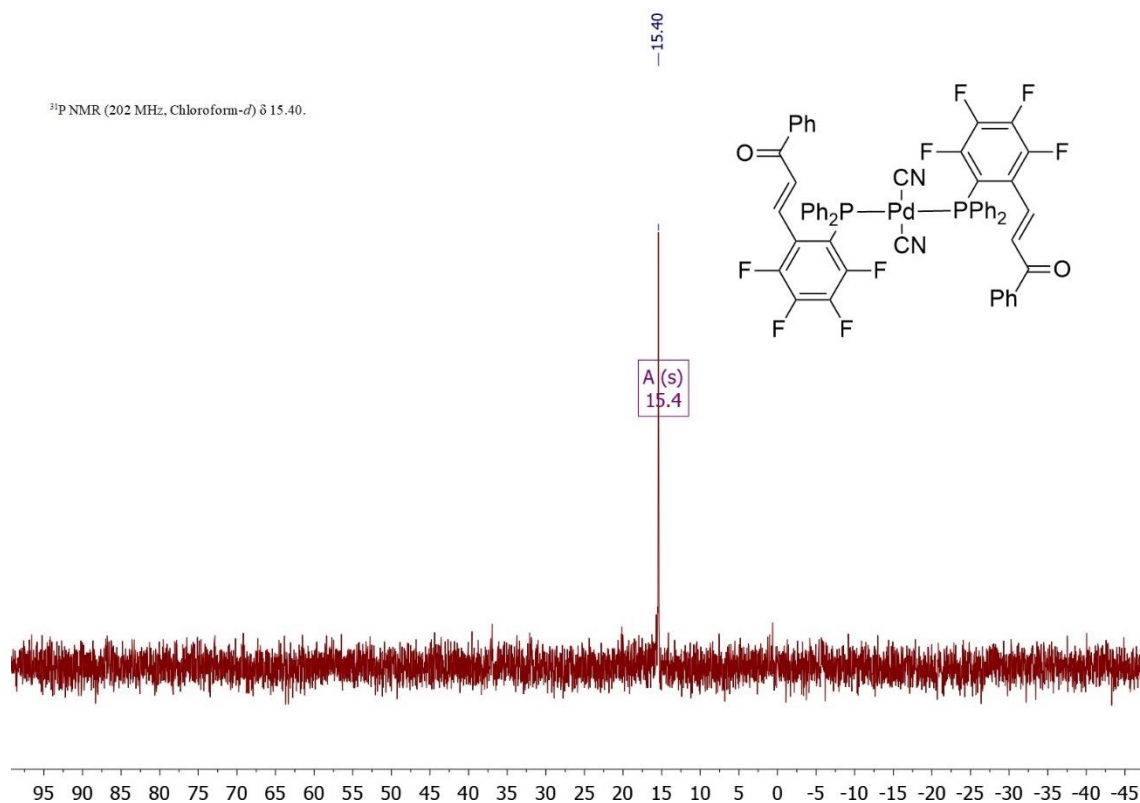

**Figure S41.**  $^{31}\text{P}\{^1\text{H}\}$  NMR of  $\text{trans-Pd}(\text{CN})_2(\text{Ph-PEWO-F}_4)_2$  ( $\mathbf{4L}^1$ ) in  $\text{CDCl}_3$ .

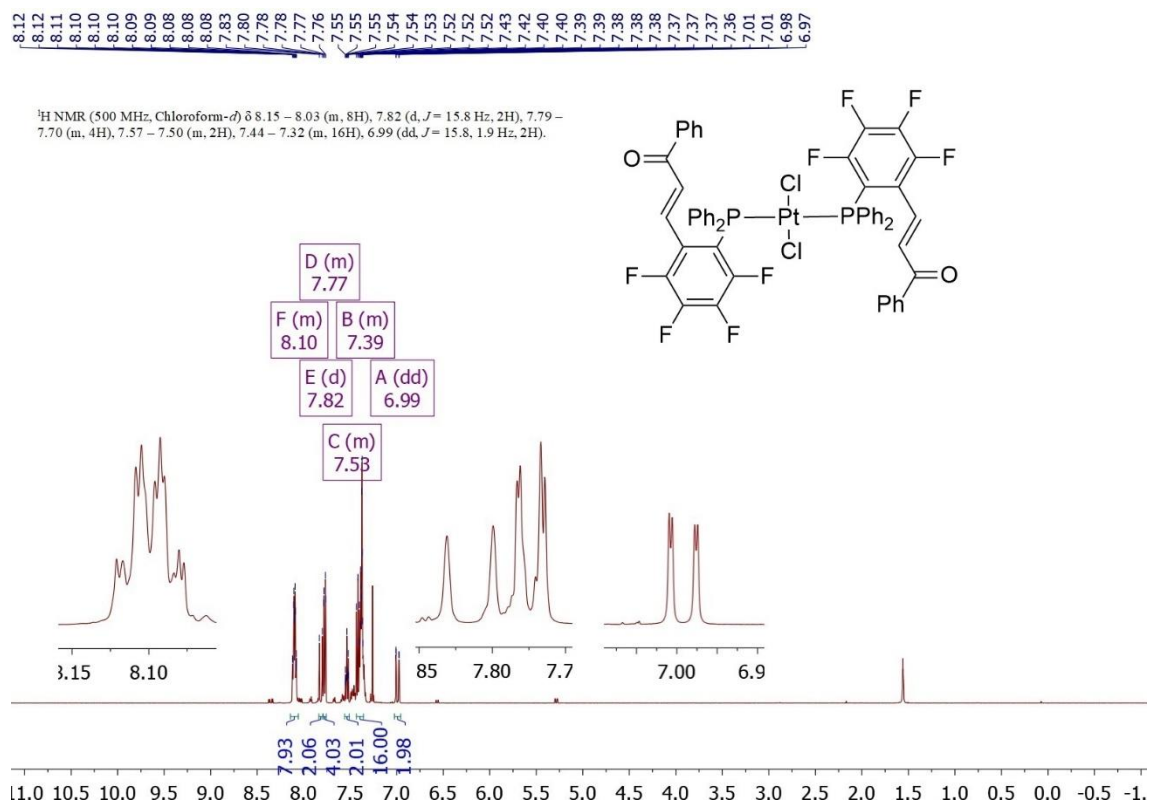

**Figure S42.**  $^1\text{H}$  NMR of  $\text{trans-PtCl}_2(\text{Ph-PEWO-F}_4)_2$  ( $\mathbf{5L}^1$ ) in  $\text{CDCl}_3$ .

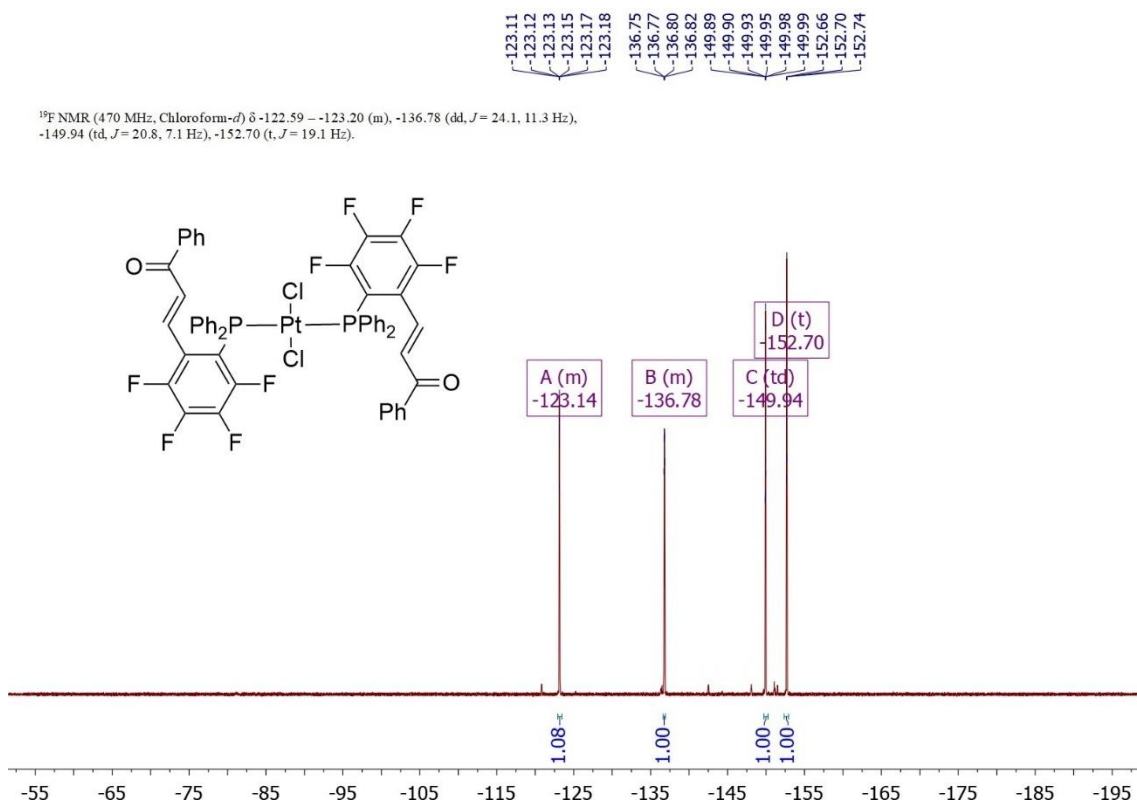

**Figure S43.** <sup>19</sup>F NMR of *trans*-PtCl<sub>2</sub>(Ph-PEWO-F<sub>4</sub>)<sub>2</sub> (**5L**<sup>1</sup>) in CDCl<sub>3</sub>.

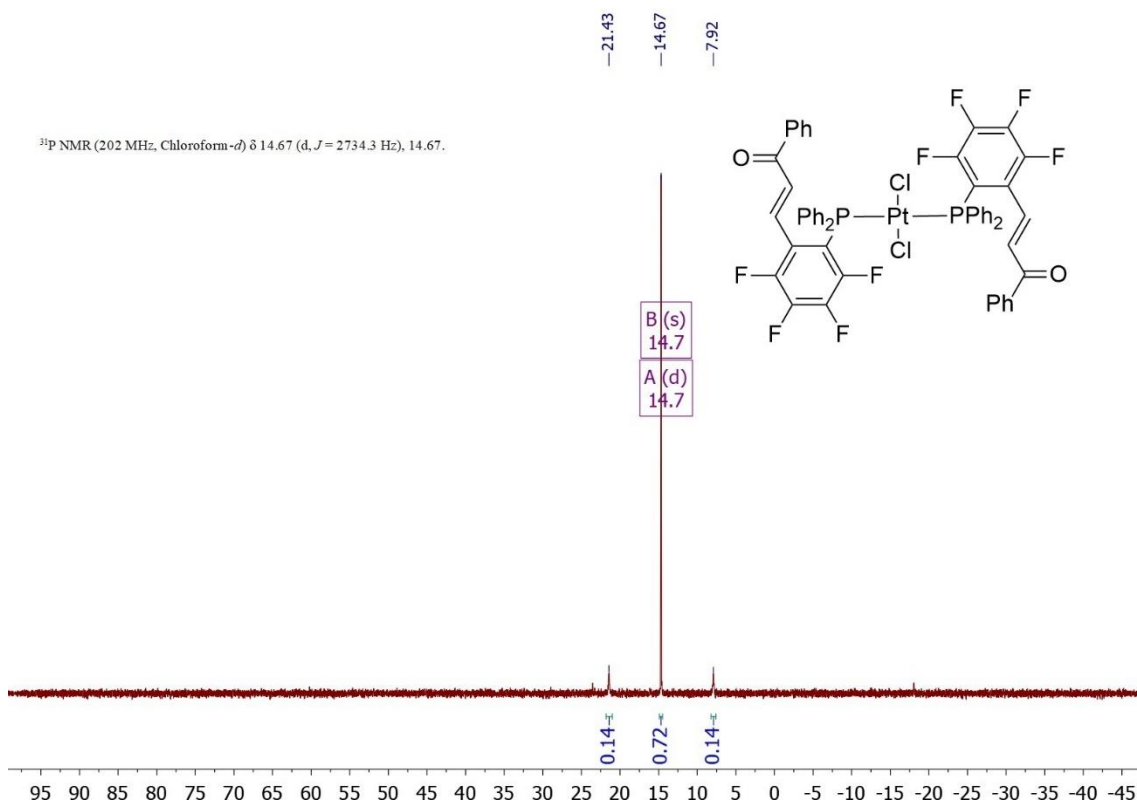

**Figure S44.** <sup>31</sup>P{<sup>1</sup>H} NMR of *trans*-PtCl<sub>2</sub>(Ph-PEWO-F<sub>4</sub>)<sub>2</sub> (**5L**<sup>1</sup>) in CDCl<sub>3</sub>.

## Fluxionality of $1L^2$ and $1L^3$ complexes

In the  $^{19}F$  NMR spectra of  $1L^2$  and  $1L^3$ , one resonance for each fluorine atom of the R-PEWO- $F_4$  ligand is expected. However, only 3 resonances are observed at room temperature, one of them being broad. Therefore,  $^{19}F$  NMR spectra of  $1L^3$  was also collected at 253 K. At this temperature, a total of 6 resonances are observed, 4 broad signals and 2 singlets with an intensity twice of the broad signals, making a total of 8 fluorine atoms, as expected. Figure S45 shows the  $^{19}F$  NMR spectra of  $1L^3$  at 253 K (bottom) and 298 K (top).

These observations indicate that, in solution, a dynamic process takes place for  $1L^2$  and  $1L^3$ . Coalescence temperature for this process is close to room temperature, which explains why one of the resonances is not observed. When the temperature is lowered, the rate of the process is lowered, and the fluorine resonances are out of coalescence. Hence, they are split in 2 resonances, one for each R-PEWO- $F_4$  ligand.

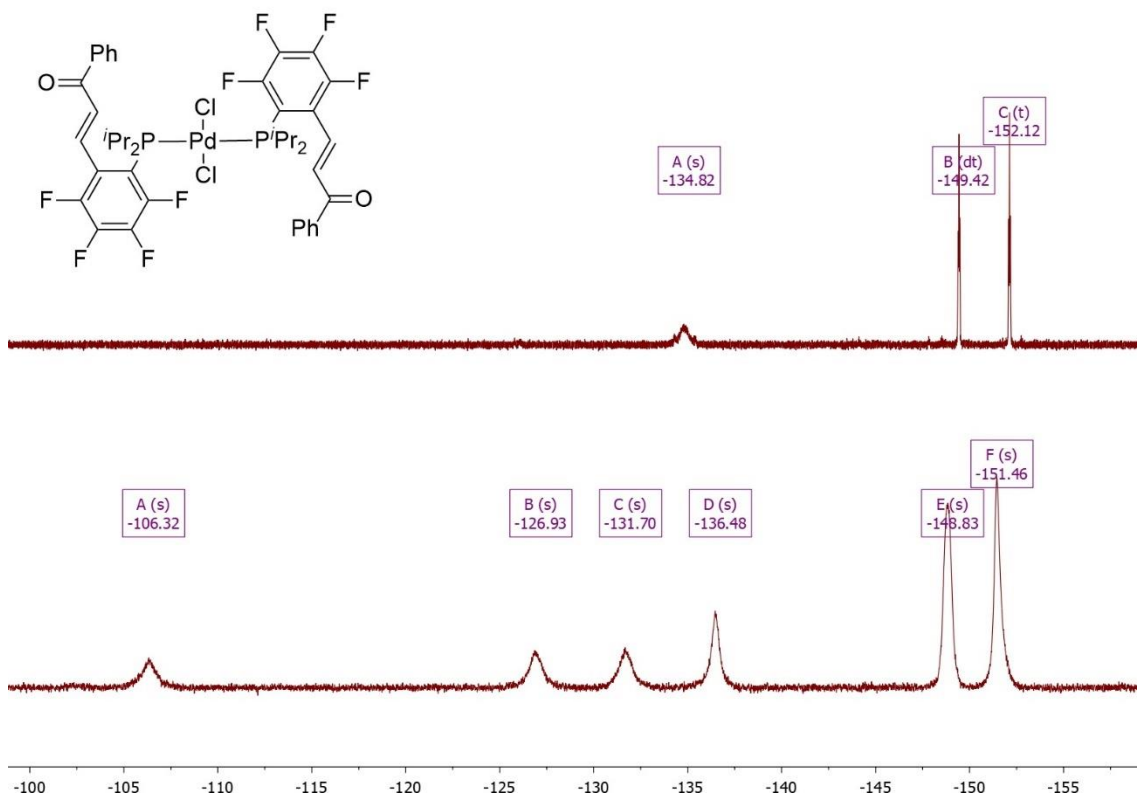

**Figure S45.**  $^{19}F$  NMR spectra of  $1L^3$  at 253 K (bottom) and 298 K (top).

## References

- <sup>1</sup> D. B. G. Williams and M. Lawton, *J. Org. Chem.*, 2010, **75**, 8351–8354.
- <sup>2</sup> E. Gioria, J. M. Martínez-Illarduya, D. García-Cuadrado, J. A. Miguel, M. Genov and P. Espinet, *Organometallics*, 2013, **32**, 4255–4261.
- <sup>3</sup> M. N. Peñas-Defrutos, A. Vélez, E. Gioria and P. Espinet, *Organometallics* 2019, **38**, 4701–4707.
- <sup>4</sup> X. Luo, H. Zhang, H. Duan, Q. Liu, L. Zhu, T. Zhang and A. Lei, *Org. Lett.* 2007, **9**, 4571–4574.
- <sup>5</sup> H. Zhang, X. Luo, K. Wongkhan, H. Duan, Q. Li, L. Zhu, J. Wang, A. S. Batsanov, J. A. K. Howard, T. B. Marder and A. Lei, *Chem. - Eur. J.* 2009, **15**, 3823–3829.
- <sup>6</sup> CrysAlisPro Software system, version 1.171.33.51, 2009, Oxford Diffraction Ltd, Oxford, UK.
- <sup>7</sup> O. V. Dolomanov, L. J. Bourhis, R. J. Gildea, J. A. K. Howard and H. Puschmann, *J. Appl. Crystallogr.*, 2009, **42**, 339–341.
- <sup>8</sup> G. M. Sheldrick, *Acta Cryst.*, 2015, **A71**, 3–8.
- <sup>9</sup> G. M. Sheldrick, Crystal structure refinement with SHELXL, *Acta Cryst.*, 2015, **C71**, 3–8.
- <sup>10</sup> M. J. Frisch, G. W. Trucks, H. B. Schlegel, G. E. Scuseria, M. A. Robb, J. R. Cheeseman, G. Scalmani, V. Barone, B. Mennucci, G. A. Petersson, H. Nakatsuji, M. Caricato, X. Li, H. P. Hratchian, A. F. Izmaylov, J. Bloino, G. Zheng, J. L. Sonnenberg, M. Hada, M. Ehara, K. Toyota, R. Fukuda, J. Hasegawa, M. Ishida, T. Nakajima, Y. Honda, O. Kitao, H. Nakai, T. Vreven, J. A. Montgomery, Jr., J. E. Peralta, F. Ogliaro, M. Bearpark, J. J. Heyd, E. Brothers, K. N. Kudin, V. N. Staroverov, T. Keith, R. Kobayashi, J. Normand, K. Raghavachari, A. Rendell, J. C. Burant, S. S. Iyengar, J. Tomasi, M. Cossi, N. Rega, J. M. Millam, M. Klene, J. E. Knox, J. B. Cross, V. Bakken, C. Adamo, J. Jaramillo, R. Gomperts, R. E. Stratmann, O. Yazyev, A. J. Austin, R. Cammi, C. Pomelli, J. W. Ochterski, R. L. Martin, K. Morokuma, V. G. Zakrzewski, G. A. Voth, P. Salvador, J. J. Dannenberg, S. Dapprich, A. D. Daniels, O. Farkas, J. B. Foresman, J. V. Ortiz, J. Cioslowski and D. J. Fox, *Gaussian 09 (Revision B.1)*; Gaussian Inc.: Wallingford CT 2010.
- <sup>11</sup> (a) A. D. Becke, *J. Chem. Phys.*, 1993, **98**, 5648–5652. (b) C. Lee, W. Yang and R. G. Parr, *Phys. Rev. B*, 1988, **37**, 785–789.
- <sup>12</sup> P. J. Hay and W. R. Wadt, *J. Chem. Phys.*, 1985, **82**, 299–310.
- <sup>13</sup> (a) P. C. Hariharan and J. A. Pople, *Theoret. Chim. Acta*, 1973, **28**, 213–222. (b) M. M. Francl, W. J. Pietro, W. J. Hehre, J. S. Binkley, M. S. Gordon, D. J. DeFrees and J. A. Pople, *J. Chem. Phys.*, 1982, **77**, 3654–3665.
- <sup>14</sup> M. E. Casida, C. Jamorski, K. C. Casida and D. R. Salahub, *J. Chem. Phys.*, 1998, **108**, 4439–4449.
